1 Transmission of SARS-CoV-2  
2 Omicron VOC subvariants BA.1 and BA.2:  
3 Evidence from Danish Households

4 Frederik Plesner Lyngse<sup>1,2,3,\*</sup>, Carsten Thure Kirkeby<sup>4</sup>,  
Matthew Denwood<sup>4</sup>, Lasse Engbo Christiansen<sup>5</sup>,  
Kåre Mølbak<sup>3,4</sup>, Camilla Holten Møller<sup>3</sup>,  
Robert Leo Skov<sup>3</sup>, Tyra Grove Krause<sup>3</sup>,  
Morten Rasmussen<sup>3</sup>, Raphael Niklaus Sieber<sup>3</sup>,  
Thor Bech Johannesen<sup>3</sup>, Troels Lillebaek<sup>3,6</sup>,  
Jannik Fonager<sup>3</sup>, Anders Fomsgaard<sup>3</sup>,  
Frederik Trier Møller<sup>3</sup>, Marc Stegger<sup>3</sup>,  
Maria Overvad<sup>3</sup>, Katja Spiess<sup>3</sup>,  
Laust Hvas Mortensen<sup>7,8</sup>

5 January 28, 2022

---

\*Correspondence to Frederik Plesner Lyngse, [fpl@econ.ku.dk](mailto:fpl@econ.ku.dk). Affiliations: <sup>1</sup>Department of Economics & Center for Economic Behaviour and Inequality, University of Copenhagen, Copenhagen, Denmark; <sup>2</sup>Danish Ministry of Health, Copenhagen, Denmark; <sup>3</sup>Statens Serum Institut, Copenhagen, Denmark; <sup>4</sup>Department of Veterinary and Animal Sciences, Faculty of Health and Medical Sciences, University of Copenhagen, Copenhagen, Denmark; <sup>5</sup>Department of Applied Mathematics and Computer Science; Dynamical Systems, Technical University of Denmark, Kgs. Lyngby, Denmark; <sup>6</sup>Global Health Section, Faculty of Health and Medical Sciences, University of Copenhagen; <sup>7</sup>Department of Applied Mathematics and Computer Science; Dynamical Systems, Technical University of Denmark, Kgs. Lyngby, Denmark; <sup>8</sup>Global Health Section, Faculty of Health and Medical Sciences, University of Copenhagen

NOTE: This preprint reports new research that has not been certified by peer review and should not be used to guide clinical practice.

## 6 1 Abstract

7 The Omicron SARS-CoV-2 variant of concern (VOC lineage B.1.1.529), which became  
8 dominant in many countries during early 2022, includes several subvariants with strikingly  
9 different genetic characteristics. Several countries, including Denmark, have observed the  
10 two Omicron subvariants: BA.1 and BA.2. In Denmark the latter has rapidly replaced  
11 the former as the dominant subvariant.

12 Based on nationwide Danish data, we estimate the transmission dynamics of BA.1 and  
13 BA.2 following the spread of Omicron VOC within Danish households in late December  
14 2021 and early January 2022.

15 Among 8,541 primary household cases, of which 2,122 were BA.2, we identified a total  
16 of 5,702 secondary infections among 17,945 potential secondary cases during a 1-7 day  
17 follow-up period. The secondary attack rate (SAR) was estimated as 29% and 39% in  
18 households infected with Omicron BA.1 and BA.2, respectively.

19 We found BA.2 to be associated with an increased susceptibility of infection for unvacci-  
20 nated individuals (Odds Ratio (OR) 2.19; 95%-CI 1.58-3.04), fully vaccinated individuals  
21 (OR 2.45; 95%-CI 1.77-3.40) and booster-vaccinated individuals (OR 2.99; 95%-CI 2.11-  
22 4.24), compared to BA.1. We also found an increased transmissibility from unvaccinated  
23 primary cases in BA.2 households when compared to BA.1 households, with an OR of  
24 2.62 (95%-CI 1.96-3.52). The pattern of increased transmissibility in BA.2 households  
25 was not observed for fully vaccinated and booster-vaccinated primary cases, where the  
26 OR of transmission was below 1 for BA.2 compared to BA.1.

27 We conclude that Omicron BA.2 is inherently substantially more transmissible than BA.1,  
28 and that it also possesses immune-evasive properties that further reduce the protective  
29 effect of vaccination against infection, but do not increase its transmissibility from vacci-  
30 nated individuals with breakthrough infections.

## 31 2 Introduction

32 The current pandemic with SARS-CoV-2 is characterized by continuous emergence of  
33 new variants taking over from previous variants as a result of natural selection (Darwin,  
34 1859). Most recently, the Omicron variant of concern (VOC), Pango lineage B.1.1.529,  
35 has become the most prevalent in most countries in Europe as well as the rest of the world  
36 (Ritchie & Roser, 2020). Of the previously identified Omicron subvariants (Mullen et al.,  
37 2022; SSI, 2022), three subvariants have been detected in Denmark, namely BA.1.1, BA.1  
38 and BA.2, where the latter two by far have been the most abundant. BA.1 and BA.2  
39 differ by approximately 40 mutations (Majumdar & Sarkar, 2021) in addition to a key  
40 deletion at position 69-70 in the spike region of BA.1 compared to BA.2 (Public Health  
41 England, 2022; Chowdhury et al., 2022).

42 By 1 January 2022, BA.2 accounted for 5% of all subvariants found in England, with an  
43 ongoing increase in this proportion (Public Health England, 2022). BA.1 was first detected  
44 in Denmark on 25 November 2021, and BA.2 was first detected on 5 December 2021. Since  
45 then, the prevalence of BA.2 has been increasing faster than that of BA.1. In week 52 of  
46 2021, BA.2 accounted for around 20% of all Danish SARS-CoV-2 cases; in week 2 in 2022  
47 this had increased to around 45%, indicating that BA.2 carries an advantage over BA.1  
48 within the highly vaccinated population of Denmark. The RT-PCR test used in Denmark  
49 does not target the S-gene deletion to detect Omicron cases, but instead targets the spike  
50 position L452 Wt (Spiess et al., 2021). Thus in the current set-up, Danish RT-PCR data  
51 cannot distinguish between BA.1 and BA.2. However, whole genome sequencing (WGS) is  
52 conducted routinely in Denmark ([www.covid19genomics.dk](http://www.covid19genomics.dk)), providing the opportunity  
53 to identify and differentiate between BA.1 and BA.2.

54 We have previously used a model of household transmission to quantify the transmissibility  
55 of VOCs, and applied this model to show that the Omicron VOC had an advantage over  
56 the Delta VOC due to immune evasiveness (Lyngse et al., 2021b).

57 The increasing numbers of BA.2 cases justify the questions we address in this study;

58 1) Is there a difference in the household transmission patterns between Omicron VOC

59 subvariant BA.1 and BA.2; and 2) if there is a difference, is it due to a difference in  
60 susceptibility, transmissibility, or both, and could this indicate a difference in immune  
61 evasiveness between the subvariants?

## 62 **3 Methods**

### 63 **3.1 Study design and participants**

64 In this study, we used Danish register data comprising all individuals in Denmark. We  
65 linked all individuals to households by their personal identification number. We only in-  
66 cluded households with 2-6 members to exclude care facilities etc. We linked this with  
67 information on all antigen and RT-PCR tests for SARS-CoV-2 from the Danish Microbi-  
68 ology Database (MiBa; Schönning et al. (2021)), and records in the Danish Vaccination  
69 Register (Krause et al., 2012). We used data on primary cases from 20 December 2021 to  
70 11 January 2022, and allowed a 7-day follow-up period for potential secondary cases, i.e.  
71 until 18 January 2022.

72 A primary case was defined as the first individual in a household testing positive with  
73 an RT-PCR test within the study period and being identified with the Omicron VOC  
74 BA.1 or BA.2 by WGS. We followed all tests of other household members in the follow-  
75 up period. A positive secondary case was defined by either a positive RT-PCR test or  
76 a positive antigen test (Jakobsen et al., 2021). Households were categorized as BA.1 or  
77 BA.2 households depending on the WGS result of the sample from the primary case.

78 In the study period, a total of approximately 25,000 mid- and high-quality SARS-CoV-2  
79 genomes were produced (appendix Table 4) at the time of analysis. Briefly, sequencing  
80 of positive SARS-CoV-2 samples was performed using short read Illumina technology  
81 (Illumina) with the Illumina COVIDSeq Test kit (Illumina). The library preparation  
82 was performed as described by the manufacturer with spike-in of amplicon 64, 70 and 74  
83 from the ARTIC v3 amplicon sequencing panel (<https://artic.network>). Samples were  
84 sequenced on either the NextSeq or NovaSeq platforms (Illumina). Consensus sequences

85 were called using an in-house implementation of IVAR (version 1.3.1) with a custom  
86 BCFtools (Li, 2011) command for consensus calling. The resulting consensus sequences  
87 were considered for variant calling when containing <3,000 ambiguous sites including  
88 N's. Variants were called using Pangolin (version 3.1.17) with PangoLEARN assignment  
89 algorithm (version 2022-01-05) on the consensus sequences (O'Toole et al., 2021).

90 The vaccination status of all individuals was classified into three groups following Lyngse  
91 et al. (2021b): i) unvaccinated (including partially vaccinated individuals); ii) fully vac-  
92 cinated (defined by the vaccine used, Comirnaty (Pfizer/BioNTech): 7 days after second  
93 dose; Vaxzevria (AstraZeneca): 15 days after second dose; Spikevax (Moderna): 14 days  
94 after second dose; Janssen (Johnson & Johnson): 14 days after vaccination, and 14 days  
95 after the second dose for cross vaccinated individuals) or 14 days after previous infection;  
96 or iii) booster-vaccinated, defined by 7 days after the booster vaccination, (Pfizer, 2021;  
97 Bomze et al., 2021). By 22 December 2021, of all vaccinated individuals in Denmark, 85%  
98 were vaccinated with Comirnaty, 14% with Spikevax, 1% with Janssen, and approximately  
99 0% with AstraZeneca (SSI, 2021).

## 100 **3.2 Statistical analyses**

101 The secondary attack rate (SAR) was defined as the proportion of potential secondary  
102 cases within the same household that tested positive between 1-7 days following the pos-  
103 itive test of the primary case in that household. We estimated the adjusted odds ratios  
104 (OR) for infection in a multivariable logistic regression model. The outcome variable in  
105 this model was the binary test result of each potential secondary case. We used the sub-  
106 variant as an explanatory variable as well as fixed effects for other potentially confounding  
107 variables; age and sex of the primary case, age and sex of the potential secondary case,  
108 household size (2-6 members), and primary case sample date to control for time related  
109 effects. To test if the subvariants behaved differently depending on the immune status of  
110 the primary cases (i.e. different transmissibility) and the potential secondary cases (i.e.  
111 different susceptibility), we included interactions between household subvariant and vac-  
112 cination status of the primary cases and the potential secondary cases, respectively.

113 To investigate the robustness of the results, we conducted a number of additional sensitiv-  
114 ity analyses, which can be found in the appendix. Here, we also describe the distribution of  
115 BA.1 and BA.2 cases over the study period and the characteristics of samples selected for  
116 WGS. We also provide statistics for a 14-day follow-up period. Additionally, we provide  
117 measures of model fit and estimates under a number of alternative specifications of the  
118 logistic regression model to assess the robustness of the findings, as well as a more detailed  
119 investigation of the pairwise OR between vaccination groups for each subvariant.

### 120 **3.3 Ethical statement**

121 This study was conducted using data from national registers only. According to Dan-  
122 ish law, ethics approval is not needed for this type of research. All data management  
123 and analyses were carried out on the Danish Health Data Authority's restricted research  
124 servers with project number FSEID-00004942. The study only contains aggregated results  
125 and no personal data. The study is, therefore, not covered by the European General Data  
126 Protection Regulation (GDPR).

### 127 **3.4 Data availability**

128 The data used in this study are available under restricted access due to Danish data  
129 protection legislation. The data are available for research upon reasonable request to The  
130 Danish Health Data Authority and Statens Serum Institut and within the framework  
131 of the Danish data protection legislation and any required permission from Authorities.  
132 We performed no data collection or sequencing specifically for this study. Consensus  
133 genome data from the Danish cases are routinely shared publicly at GISAID ([www.gisaid.org](http://www.gisaid.org)).  
134 [org](http://www.gisaid.org)).

## 135 **4 Results**

136 We identified 2,122 households with BA.2 comprising a total of 4,587 potential secondary  
137 cases, of which 1,792 tested positive within 7 days, resulting in a SAR of 39%. Similarly,

138 we identified 6,419 households with BA.1 comprising a total of 13,358 potential secondary  
139 cases, of which 3,910 tested positive, resulting in a SAR of 29%. The distributions of age,  
140 sex, household size and vaccination status in primary and potential secondary cases were  
141 broadly comparable between BA.1 and BA.2 households (Table 1).

Table 1: Summary statistics

|                                       | Omicron - BA.2 |                           |                          |         | Omicron - BA.1 |                           |                          |         |
|---------------------------------------|----------------|---------------------------|--------------------------|---------|----------------|---------------------------|--------------------------|---------|
|                                       | Primary Cases  | Potential Secondary Cases | Positive Secondary Cases | SAR (%) | Primary Cases  | Potential Secondary Cases | Positive Secondary Cases | SAR (%) |
| <b>Total, N</b>                       | 2,122          | 4,587                     | 1,792                    | 39      | 6,419          | 13,358                    | 3,910                    | 29      |
| <b>Sex, %</b>                         |                |                           |                          |         |                |                           |                          |         |
| Male                                  | 49             | 50                        | 49                       | 38      | 49             | 50                        | 48                       | 28      |
| Female                                | 51             | 50                        | 51                       | 40      | 51             | 50                        | 52                       | 31      |
| <b>Age, %</b>                         |                |                           |                          |         |                |                           |                          |         |
| 0-10                                  | 8              | 17                        | 19                       | 42      | 5              | 17                        | 19                       | 33      |
| 10-20                                 | 25             | 18                        | 16                       | 34      | 23             | 19                        | 17                       | 26      |
| 20-30                                 | 23             | 14                        | 13                       | 38      | 27             | 15                        | 16                       | 31      |
| 30-40                                 | 15             | 12                        | 18                       | 56      | 15             | 11                        | 15                       | 42      |
| 40-50                                 | 11             | 18                        | 17                       | 38      | 12             | 18                        | 17                       | 27      |
| 50-60                                 | 11             | 14                        | 12                       | 32      | 11             | 14                        | 10                       | 22      |
| 60-70                                 | 4              | 4                         | 3                        | 35      | 5              | 4                         | 4                        | 25      |
| 70+                                   | 3              | 2                         | 2                        | 30      | 3              | 2                         | 2                        | 26      |
| <b>Household size, %</b>              |                |                           |                          |         |                |                           |                          |         |
| 2                                     | 37             | 17                        | 19                       | 44      | 40             | 19                        | 22                       | 33      |
| 3                                     | 24             | 23                        | 21                       | 37      | 25             | 24                        | 22                       | 27      |
| 4                                     | 26             | 36                        | 38                       | 41      | 23             | 34                        | 35                       | 31      |
| 5                                     | 10             | 18                        | 16                       | 34      | 9              | 18                        | 17                       | 28      |
| 6                                     | 2              | 6                         | 5                        | 35      | 2              | 5                         | 4                        | 23      |
| <b>Immunity, %</b>                    |                |                           |                          |         |                |                           |                          |         |
| Unvaccinated                          | 21             | 26                        | 29                       | 43      | 16             | 26                        | 30                       | 34      |
| Fully vaccinated / previous infection | 52             | 42                        | 44                       | 41      | 59             | 44                        | 47                       | 31      |
| Booster vaccinated                    | 26             | 32                        | 27                       | 34      | 25             | 30                        | 23                       | 22      |

Notes: The secondary attack rate (SAR) is expressed as a percentage (%). Total numbers (N) is presented in the first row. Summary statistics based on primary cases are shown separately from summary statistics of potential secondary cases, positive secondary cases and SAR. The raw numbers (N) for each category is presented in appendix Table 5. The summary statistics stratified by the primary case level are presented in appendix Tables 6 and 7.

142 Within 7 days of the identification of the primary cases, 84% of the potential secondary  
143 cases had been tested once, regardless of subvariant, and 60-61% had been tested twice  
144 (Figure 1, panel a). In households infected with the Omicron BA.2 (red), the SAR was  
145 8% on day 1 and 39% on day 7. Similarly, in households infected with BA.1 (blue), the  
146 SAR was 6% and 29%, respectively.

Figure 1: Probability of being tested and testing positive

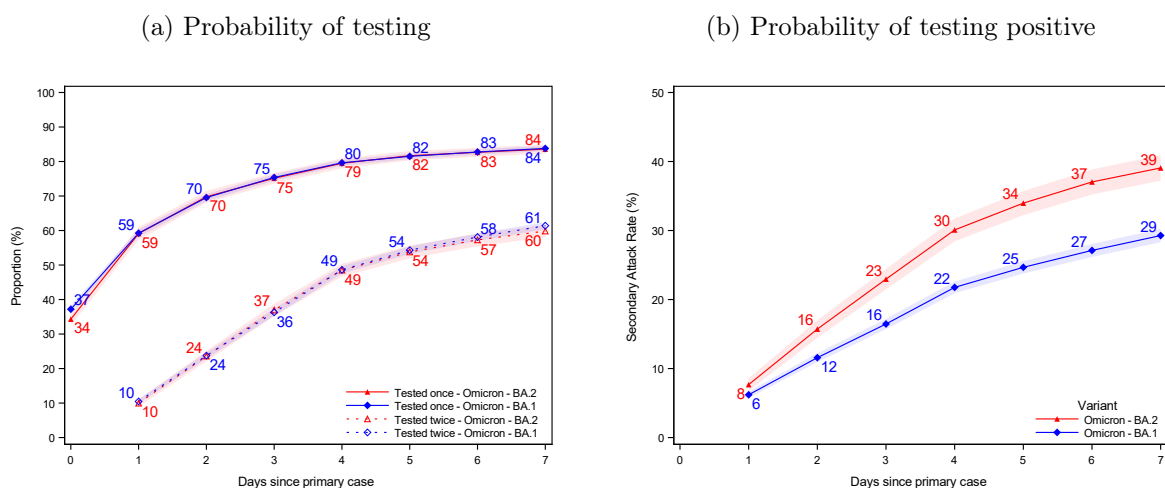

Notes: Panel (a) shows the probability of potential secondary cases being tested after a primary case has been identified within the household. Panel (b) shows the probability of potential secondary cases that test positive subsequently to a primary case being identified within the household. Note that the latter is not conditional on being tested, i.e. the denominator contains test-negative individuals and untested individuals. The x-axes show the days since the primary case tested positive, and the y-axes show the proportion of individuals either being tested (a) or testing positive (b) with either antigen or RT-PCR tests, stratified for the subvariant of the primary case. The SAR for each day according to the subvariant primary case can be read directly from panel (b). For example, the SAR on day 7 is 39% for BA.2 (red) and 29% for BA.1 (blue), whereas the SAR on day 4 is 30% and 22%, respectively. The shaded areas show the 95% confidence bands clustered on the household level. Appendix Figure 3 presents the two panels with a 14 day follow-up period. Appendix Figure 4 presents the 14 day SAR for Omicron BA.1, BA.2, and Delta VOC, as well as those without a known variant.

147 We observed a general gradient in both Omicron BA.1 and BA.2 households such that  
 148 the susceptibility of potential secondary cases was highest among the unvaccinated and  
 149 lowest among the booster vaccinated, but the effect of vaccination appeared to be lower  
 150 for Omicron BA.2 than for BA.1 (see Table 2, and the interactions in Figure 6). We  
 151 observed lower transmissibility in both BA.1 and BA.2 households when the primary case  
 152 was booster vaccinated rather than fully vaccinated.



Table 2: Effect of Vaccination

|                        | Susceptibility          |                         | Transmissibility        |                         |
|------------------------|-------------------------|-------------------------|-------------------------|-------------------------|
|                        | Omicron BA.2 households | Omicron BA.1 households | Omicron BA.2 households | Omicron BA.1 households |
| Unvaccinated           | 1.10<br>(0.92-1.32)     | 1.23<br>(1.09-1.40)     | 1.21<br>(0.97-1.50)     | 0.93<br>(0.80-1.08)     |
| Fully vaccinated       | ref<br>(.)              | ref<br>(.)              | ref<br>(.)              | ref<br>(.)              |
| Booster vaccinated     | 0.80<br>(0.67-0.94)     | 0.65<br>(0.58-0.73)     | 0.79<br>(0.64-0.98)     | 0.77<br>(0.70-0.88)     |
| Number of observations | 17,945                  | 17,945                  | 17,945                  | 17,945                  |
| Number of households   | 8,541                   | 8,541                   | 8,541                   | 8,541                   |

Notes: This table shows odds ratio estimates for susceptibility and transmissibility by vaccination status. Column 1 shows the susceptibility based on the vaccination status of the potential secondary case, conditional on being in a household infected with BA.2. Column 2 shows the susceptibility based on the vaccination status of the potential secondary case, conditional on being in a household infected with BA.1. Column 3 shows the transmissibility based on the vaccination status of the primary case, conditional on being in a household infected with BA.2. Column 4 shows the transmissibility based on the vaccination status of the primary case, conditional on being in a household infected with BA.1. Note that all estimates are from the same model, but with a different reference category across column 1-4. The estimates are adjusted for age and sex of the primary case, age and sex of the potential secondary case, size of the household, and primary case sample date. The estimates are furthermore adjusted for vaccination status of the potential secondary case and primary case interacted with the household subvariant. 95% confidence intervals are shown in parentheses. Standard errors are clustered on the household level. The odds ratio estimates for the full model are presented in the appendix Table 12, column I.

153 Relative to Omicron BA.1 households, we found an increased susceptibility for both un-  
154 vaccinated (OR 2.19; 95%-CI 1.58-3.04), fully vaccinated (OR 2.45; 95%-CI 1,77-3,40)  
155 and booster-vaccinated individuals (OR 2.99; 95%-CI 2.11-4.24) in BA.2 households (Ta-  
156 ble 3). We also observed increased transmissibility in BA.2 households from unvaccinated  
157 primary cases when compared to BA.1 households with an OR of 2.62 (95%-CI 1.96-3.52).  
158 The pattern of increased transmissibility in BA.2 households was not observed for fully  
159 vaccinated and booster-vaccinated primary cases, where the estimates were below 1 for  
160 BA.2 compared to BA.1 (Table 3).

Table 3: Relative effect of Omicron VOC BA.2 vs. BA.1

|                         | Susceptibility      |                     |                     | Transmissibility    |                     |                     |
|-------------------------|---------------------|---------------------|---------------------|---------------------|---------------------|---------------------|
|                         | Unvaccinated        | Fully vaccinated    | Booster vaccinated  | Unvaccinated        | Fully vaccinated    | Booster vaccinated  |
| Omicron BA.2 households | 2.19<br>(1.58-3.04) | 2.45<br>(1.77-3.40) | 2.99<br>(2.11-4.24) | 2.62<br>(1.96-3.52) | 0.60<br>(0.42-0.85) | 0.62<br>(0.42-0.91) |
| Omicron BA.1 households | ref<br>(.)          | ref<br>(.)          | ref<br>(.)          | ref<br>(.)          | ref<br>(.)          | ref<br>(.)          |
| Number of observations  | 17,945              | 17,945              | 17,945              | 17,945              | 17,945              | 17,945              |
| Number of households    | 8,541               | 8,541               | 8,541               | 8,541               | 8,541               | 8,541               |

Notes: This table shows odds ratio estimates for the effect of living in a household infected with BA.2 relative to BA.1. Column 1 and 4 shows the relative transmission of BA.2, conditional on being unvaccinated. Column 2 and 5 shows the relative transmission of BA.2, conditional on being fully vaccinated. Column 3 and 6 shows the relative transmission of BA.2, conditional on being booster vaccinated. Note, all estimates are from the same model, but with a different reference category across column 1-6. The estimates are adjusted for age and sex of the primary case, age and sex of the potential secondary case, size of the household, and primary case sample date. The estimates are furthermore adjusted for vaccination status of the potential secondary case and primary case interacted with the household subvariant. 95% confidence intervals are shown in parentheses. Standard errors are clustered on the household level. The odds ratio estimates for the full model are presented in Appendix Table 12, column I.

161 In the appendix, where we allowed for a 14-day follow-up, we found a 14-day SAR of 42%  
162 for BA.2 and 36% for BA.1 (appendix Figure 3).

163 The distribution of sample Ct values for unvaccinated primary cases showed that the viral  
164 load was overall higher for BA.2 cases than for BA.1 cases. This was not the case for fully  
165 vaccinated and booster-vaccinated individuals, where the distribution appeared to be the  
166 same (appendix Figure 5 and appendix Table 8).

## 167 5 Discussion

168 The present study shows that infection with the Omicron BA.2 subvariant generally lead  
169 to a higher SAR compared to BA.1 across all groups of sex, age, household sizes and  
170 immunity groups (Table 1). Furthermore, we found that booster-vaccinated individuals  
171 had a reduced susceptibility and transmissibility for both BA.1 and BA.2 compared to  
172 fully vaccinated individuals (Table 2). Efficient transmission to vaccinated individuals  
173 corroborates previous findings that the Omicron VOC possess immune evasive properties  
174 (Zhang et al., 2021; Lyngse et al., 2021b; Ferguson et al., 2021; Planas et al., 2021). How-  
175 ever, both booster-vaccinated individuals and fully-vaccinated individuals had reduced  
176 susceptibility and transmissibility compared to unvaccinated individuals for both subvari-

177 ants, suggesting that the effectiveness of vaccines remains significant (appendix Figure  
178 6).

179 Both unvaccinated, fully vaccinated and booster-vaccinated individuals had a higher sus-  
180 ceptibility for BA.2 compared to BA.1, indicating an inherent increased transmissibility of  
181 BA.2 (Table 3). However, the relative increase in susceptibility was significantly greater in  
182 vaccinated individuals compared to unvaccinated individuals (appendix Figure 6), which  
183 points towards immune evasive properties of the BA.2 conferring an even greater advan-  
184 tage for BA.2 in a highly vaccinated population such as Denmark. Because previous  
185 studies of the Omicron VOC has focused on the BA.1 (Pearson et al., 2021; Planas et al.,  
186 2021), new studies are needed to further investigate these properties for BA.2.

187 Unvaccinated individuals had a higher transmissibility with BA.2 compared to BA.1.  
188 Contrary to this, fully vaccinated and booster-vaccinated individuals had a reduced trans-  
189 missibility, due to a significant negative interaction between subvariant and booster/fully  
190 vaccinated individuals compared to unvaccinated individuals (appendix Figure 6). This  
191 indicates that after a breakthrough infection, vaccination protects against further trans-  
192 mission, and more so for BA.2 than BA.1. This mechanism is only possible to identify in  
193 studies that take into account the exposure of individuals.

194 A potential mechanism for the higher transmissibility of unvaccinated individuals infected  
195 with BA.2 compared to BA.1 could be a higher viral load (appendix 7.3). No such  
196 difference was found for fully or booster-vaccinated individuals, which could be a result of  
197 a lower viral load in vaccinated individuals with a breakthrough infection (Puhach et al.,  
198 2022; Levine-Tiefenbrun et al., 2021; Lyngse et al., 2022).

199 The higher susceptibility and transmissibility among unvaccinated will likely result in  
200 even more extensive transmission of BA.2 in unvaccinated children in school settings and  
201 day care.

202 This study has a number of strengths. Firstly, Denmark is, to the best of our knowledge,  
203 the only country in the world that have been able to identify a large amount of both  
204 BA.1 and BA.2 cases in December 2021 and January 2022. Secondly, any bias introduced

205 in the identification of the subvariants will presumably affect both BA.1 and BA.2 in  
206 a similar way. Third, this study draws on exhaustive population registers with a high  
207 quality of information covering the whole population. Fourth, potential secondary cases  
208 were frequently being tested: 84% one time, and 60-61% two times.

209 Some limitations apply to this study. The study period runs over Christmas 2021 and New  
210 Year's Eve 2021/22, which are public holidays in Denmark. Despite government advice to  
211 limit social activity, it is likely that there has been considerable social mixing with family  
212 and friends outside the households during this period. Social mixing over the holidays  
213 in conjunction with the high incidence levels in Denmark during this period likely means  
214 that some secondary cases in this study are actually misclassified co-primary cases, i.e.  
215 infections picked up outside the household and testing positive after each other. However,  
216 this potential bias would be applicable to both subvariants. Moreover, our estimates were  
217 robust when only including primary cases from 5-11 January 2022 (appendix Table 12,  
218 model II) and when only including secondary cases found on day 2-7 or 3-7 (appendix  
219 Table 13, model VII and VIII).

220 The present household study showed a transmission advantage of Omicron BA.2 over  
221 BA.1. Although vaccinations, in particular booster vaccinations, did protect against  
222 infection, the 2.45 (fully vaccinated) and 2.99 (booster vaccinated) fold higher odds of  
223 infection in BA.2 households indicate that BA.2 as a phenotype represents a further step  
224 in immune evasion in the Omicron lineage. However, it is likely that this change came  
225 with an evolutionary cost for BA.2. To our surprise, we found a decreased transmissibility  
226 of BA.2 relative to BA.1 among fully vaccinated and booster vaccinated, with estimates  
227 of 0.60 and 0.62, respectively. Based on such a considerable loss in transmissibility among  
228 vaccinated individuals, it is not straightforward to predict the future trajectory of BA.2  
229 relative to BA.1 or other potentially emerging variants.

230 Evolution of SARS-CoV-2 variants, including the Omicron VOC, is constantly evolving,  
231 especially during the current record high transmission in many countries. For public  
232 health, it is reassuring that BA.2, like BA.1, seems to be associated with favorable out-

233 comes relative to the Delta variant, and that vaccines protect in particular against hospital  
234 admissions and severe illness (Wolter et al., 2022; Bager et al., 2022). Even with the emer-  
235 gence of BA.2, vaccines have an effect against infection, transmission and severe disease,  
236 although reduced compared to the ancestral variants. The combination of high incidence  
237 of a relative innocuous subvariant has raised optimism (Sundhedsministeriet, 2022). It is,  
238 however, important to follow the future evolution of the BA.2 subvariant closely, as well  
239 as future emergent subvariants. Thus, it is critical to maintain rapid high-quality WGS  
240 with random sampling as part of surveillance to continuously support the risk assessment  
241 of new variants, their impact on public health and to inform public health policy makers,  
242 when navigating during a pandemic.

## 243 References

- 244 Bager, P., Wohlfahrt, J., Bhatt, S., Edslev, S. M., Sieber, R. N., Ingham, A. C., Stegger,  
245 M., Legarth, R., Holten Møller, C., Skov, R. L., Valentiner-Branth, P., Overvad, M.,  
246 Gram, M. A., Lomholt, F. K., Hallundbæk, L., Espensen, C. H., Gubbels, S. M., Voldst-  
247 edlund, M., Karakis, M., Møller, K. L., Olsen, S. S., Fischer, T. K., Barrella Harboe, Z.,  
248 Johannesen, C. K., van Wijhe, M., Holler, J. G., Simonsen, L., Dessau, R. B. C., Friis,  
249 M. B., Fuglsang-Damgaard, D., Pinholt, M., Kirkby, N. S., Thomsen, M. K., Syden-  
250 ham, T. V., Coia, J. E., Marmolin, E. S., Fomsgaard, A., Fonager, J., Rasmussen, M.,  
251 Spiess, K., Marving, E., Cohen, A., Larsen, N. B., Lillebaek, T., Ullum, H., Mølbak, K.,  
252 & Grove Krause, T. (2022). Reduced Risk of Hospitalisation Associated With Infection  
253 With SARS-CoV-2 Omicron Relative to Delta: A Danish Cohort Study. *SSRN*.
- 254 Bomze, D., Sprecher, E., & Gamzu, R. (2021). Effect of a nationwide booster vaccine  
255 rollout in Israel on SARS-CoV-2 infection and severe illness in young adults. *Travel*  
256 *medicine and infectious disease*, 44, 102195.
- 257 Chowdhury, S., Bappy, M. H., Chowdhury, S., Chowdhury, M. S., & Chowdhury, N. S.  
258 (2022). Omicron Variant (B. 1.1. 529) of SARS-CoV-2, A Worldwide Public Health  
259 Emergency! *European Journal of Clinical Medicine*, 3(1), 5–9.
- 260 Darwin, C. (1859). *On the Origin of Species by Means of Natural Selection*. London:  
261 John Murray.
- 262 Ferguson, N., Ghani, A., Cori, A., Hogan, A., Hinsley, W., & Volz, E. (2021). Report 49:  
263 Growth, population distribution and immune escape of Omicron in England. *Imperial*  
264 *College London (16-12-2021)*, doi: [https://doi.org/1025561, 93038](https://doi.org/10.25561,93038).
- 265 Jakobsen, K. K., Schmidt Jensen, J., Todsén, T., Kirkby, N., Lippert, F., Vangsted,  
266 A.-M., Klokke, M., & von Buchwald, C. (2021). Accuracy of anterior nasal swab  
267 rapid antigen tests compared with RT-PCR for massive SARS-CoV-2 screening in low  
268 prevalence population. *APMIS*.

- 269 Krause, T. G., Jakobsen, S., Haarh, M., & Mølbak, K. (2012). The Danish vaccination  
270 register. *Eurosurveillance*, 17(17), 20155.
- 271 Levine-Tiefenbrun, M., Yelin, I., Katz, R., Herzel, E., Golan, Z., Schreiber, L., Wolf, T.,  
272 Nadler, V., Ben-Tov, A., Kuint, J., et al. (2021). Decreased SARS-CoV-2 viral load  
273 following vaccination. *MedRxiv*.
- 274 Li, H. (2011). A statistical framework for SNP calling, mutation discovery, association  
275 mapping and population genetical parameter estimation from sequencing data. *Bioin-*  
276 *formatics*, 27(21), 2987–2993.
- 277 Lyngse, F. P., Mølbak, K., Denwood, M., Christiansen, L. E., Møller, C. H., Rasmussen,  
278 M., Cohen, A. S., Stegger, M., Fonager, J., Sieber, R., et al. (2022). Effect of Vaccination  
279 on Household Transmission of SARS-CoV-2 Delta VOC. *medRxiv*.
- 280 Lyngse, F. P., Mølbak, K., Skov, R. L., Christiansen, L. E., Mortensen, L. H., Albertsen,  
281 M., Møller, C. H., Krause, T. G., Rasmussen, M., Michaelsen, T. Y., et al. (2021a).  
282 Increased transmissibility of SARS-CoV-2 lineage B. 1.1. 7 by age and viral load. *Nature*  
283 *Communications*, 12(1), 1–8.
- 284 Lyngse, F. P., Mortensen, L. H., Denwood, M. J., Christiansen, L. E., Møller, C. H.,  
285 Skov, R. L., Spiess, K., Fomsgaard, A., Lassaunière, R., Rasmussen, M., Stegger, M.,  
286 Nielsen, C., Sieber, R. N., Cohen, A. S., Møller, F. T., Overvad, M., Mølbak, K.,  
287 Krause, T. G., & Kirkeby, C. T. (2021b). SARS-CoV-2 Omicron VOC Transmission in  
288 Danish Households. *MedRxiv*.
- 289 Majumdar, S. & Sarkar, R. (2021). Mutational and phylogenetic analyses of the two  
290 lineages of the Omicron variant. *Journal of medical virology*.
- 291 Mullen, J. L., Tsueng, G., Latif, A. A., Alkuzweny, M., Cano, M., Haag, E., Zhou,  
292 Jerry Zeller, M., Hufbauer, E., Matteson, N., Andersen, K. G., Wu, C., Su, A. I.,  
293 Gangavarapu, K., Hughes, L. D., & for Viral Systems Biology outbreak, C. (2022).  
294 SARS-CoV-2 (hCoV-19) Mutation Reports.

- 295 O'Toole, Á., Hill, V., Pybus, O. G., Watts, A., Bogoch, I. I., Khan, K., Messina, J. P.,  
296 COVID, T., et al. (2021). Tracking the international spread of SARS-CoV-2 lineages  
297 B. 1.1. 7 and B. 1.351/501Y-V2. *Wellcome Open Research*, 6.
- 298 Pearson, C. A., Silal, S. P., Li, M. W., Dushoff, J., Bolker, B. M., Abbott, S., van  
299 Schalkwyk, C., Davies, N. G., Barnard, R. C., Edmunds, W. J., et al. (2021). Bounding  
300 the levels of transmissibility & immune evasion of the Omicron variant in South Africa.  
301 *medRxiv*.
- 302 Pfizer (2021). Pfizer and Biontech submit request to amend U.S. FDA  
303 emergency use authorization of their Covid-19 vaccine booster to in-  
304 clude all individuals 18 and older) [https://cdn.pfizer.com/pfizercom/2021-](https://cdn.pfizer.com/pfizercom/2021-11/Booster_10K_Efficacy_EUA_Submission_Statement_Final_11921.pdf?linkId=139453336)  
305 [11/Booster\\_10K\\_Efficacy\\_EUA\\_Submission\\_Statement\\_Final\\_11921.pdf?linkId=139453336](https://cdn.pfizer.com/pfizercom/2021-11/Booster_10K_Efficacy_EUA_Submission_Statement_Final_11921.pdf?linkId=139453336)  
306 (Accessed 2021-12-21).
- 307 Planas, D., Saunders, N., Maes, P., Guivel-Benhassine, F., Planchais, C., Buchrieser, J.,  
308 Bolland, W.-H., Porrot, F., Staropoli, I., Lemoine, F., et al. (2021). Considerable escape  
309 of SARS-CoV-2 Omicron to antibody neutralization. *Nature*, (pp. 1–7).
- 310 Public Health England (2022). SARS-CoV-2 variants of concern and variants under in-  
311 vestigation in England. *technical briefing 34*.
- 312 Puhach, O., Adea, K., Hulo, N., Sattoune-Roche, P., Genecand, C., Iten, A., Bausch,  
313 F. J., Kaiser, L., Vetter, P., Eckerle, I., et al. (2022). Infectious viral load in unvaccinated  
314 and vaccinated patients infected with SARS-CoV-2 WT, Delta and Omicron. *medRxiv*.
- 315 R Core Team (2021). *R: A Language and Environment for Statistical Computing*. R  
316 Foundation for Statistical Computing, Vienna, Austria.
- 317 Ritchie, H. & Roser, M. (2020). Share of SARS-CoV-2 sequences that are the  
318 omicron variant, Jan 21, 2022. [https://ourworldindata.org/grapher/covid-cases-](https://ourworldindata.org/grapher/covid-cases-omicron?country=GBR_FRA_BEL_DEU_ITA_ESP_USA_ZAF_BWA_AUS)  
319 [omicron?country=GBR\\_FRA\\_BEL\\_DEU\\_ITA\\_ESP\\_USA\\_ZAF\\_BWA\\_AUS](https://ourworldindata.org/grapher/covid-cases-omicron?country=GBR_FRA_BEL_DEU_ITA_ESP_USA_ZAF_BWA_AUS).
- 320 Schønning, K., Dessau, R. B., Jensen, T. G., Thorsen, N. M., Wiuff, C., Nielsen, L.,  
321 Gubbels, S., Denwood, M., Thygesen, U. H., Christensen, L. E., Møller, C. H., Møller,



- 322 J. K., Ellermann-Eriksen, S., Østergaard, C., Lam, J. U. H., Abushalleeh, N., Meaidi,  
323 M., Olsen, S., Mølbak, K., & Voldstedlund, M. (2021). Electronic reporting of diag-  
324 nostic laboratory test results from all healthcare sectors is a cornerstone of national  
325 preparedness and control of COVID-19 in Denmark. *APMIS*, 129(7), 438–451.
- 326 Spiess, K., Gunalan, V., Marving, E., Nielsen, S. H., Joergensen, M. G., Fomsgaard,  
327 A. S., Nielsen, L., Alfaro-Nunez, A., Karst, S. M., Mortensen, S., et al. (2021). Rapid  
328 surveillance platforms for key SARS-CoV-2 mutations in Denmark. *medRxiv*.
- 329 SSI (2021). Covid-19 Vaccinatedashboard, (accessed 2021-12-22).  
330 <https://experience.arcgis.com/experience/9824b03b114244348ef0b10f69f490b4/page/Regionalt/>.
- 331 SSI (2022). Now, an Omicron variant, BA.2, accounts for almost half of all Danish  
332 Omicron-cases.
- 333 Sundhedsministeriet (2022). Alle restriktioner udløber d. 31. januar.
- 334 Wolter, N., Jassat, W., Walaza, S., Welch, R., Moultrie, H., Groome, M., Amoako, D. G.,  
335 Everatt, J., Bhiman, J. N., Scheepers, C., et al. (2022). Early assessment of the clinical  
336 severity of the SARS-CoV-2 omicron variant in South Africa: a data linkage study. *The*  
337 *Lancet*.
- 338 Zhang, X., Wu, S., Wu, B., Yang, Q., Chen, A., Li, Y., Zhang, Y., Pan, T., Zhang, H.,  
339 & He, X. (2021). SARS-CoV-2 Omicron strain exhibits potent capabilities for immune  
340 evasion and viral entrance. *Signal transduction and targeted therapy*, 6(1), 1–3.

## 341 **Acknowledgements**

342 We thank Statens Serum Institut and The Danish Health Data Authority for collecting  
343 and providing access to data access. We also thank the rest of the Expert Group for  
344 Mathematical Modeling of COVID-19 at Statens Serum Institut for helpful discussions.  
345 The authors wish to thank the Danish Covid-19 Genome Consortium for genotyping  
346 SARS-CoV-2 positive samples. We thank Simon Kylvæk Andersen (Department of  
347 Economics, University of Copenhagen) for proofreading the manuscript.

## 348 **Funding**

349 Frederik Plesner Lyngse: Independent Research Fund Denmark (Grant no. 9061-00035B.);  
350 Novo Nordisk Foundation (grant no. NNF17OC0026542); the Danish National Research  
351 Foundation through its grant (DNRF-134) to the Center for Economic Behavior and In-  
352 equality (CEBI) at the University of Copenhagen. Laust Hvas Mortensen is supported  
353 in part by grants from the Novo Nordisk Foundation (grant no. NNF17OC0027594,  
354 NNF17OC0027812).

## 355 **Contributions**

356 FPL performed all data analyses. MD calculated the contrasts between vaccination  
357 groups. FPL, CTK and LHM wrote the first draft. All other authors contributed to  
358 the discussion, revised the first draft and approved the submitted version.

## 359 **Competing interests**

360 The authors declare no competing interests.

## 361 **Supplementary Appendix**

### 362 **6 Background**

363 This section provides some background characteristics for all of Denmark, i.e. not re-  
364 stricted to the study sample used for the analysis of household transmission.

#### 365 **6.1 Number of tests**

366 Table 4 shows the number of antigen (AG) tests and RT-PCR tests in Denmark from 1  
367 December 2021 to 19 January 2022. The table also provides information on the number  
368 of successfully sequenced positive RT-PCR tests by SARS-CoV-2 variant, including their  
369 relative proportion. On 20 December 2021, Omicron BA.2 comprised 5% of all infections,  
370 and Omicron BA.1 comprised 64%, while Delta comprised 30%. By 11 January 2022, the  
371 proportions were 47%, 53%, and 0%, respectively.

Table 4: Number of tests in Denmark, 1 December 2021–19 January 2022

| Sample date | AG tests |             | RT-PCR tests |             | Variant   |        |           |        |         |    |
|-------------|----------|-------------|--------------|-------------|-----------|--------|-----------|--------|---------|----|
|             | Tests N  | Positives N | Tests N      | Positives N | Omicron N | BA.2 % | Omicron N | BA.1 % | Delta N | %  |
| 01-12-2021  | 177,466  | 1,946       | 188,052      | 4,874       | 0         | 0      | 56        | 2      | 2,298   | 98 |
| 02-12-2021  | 217,978  | 1,908       | 216,548      | 4,960       | 0         | 0      | 43        | 2      | 2,630   | 98 |
| 03-12-2021  | 237,466  | 1,891       | 189,592      | 5,599       | 0         | 0      | 34        | 1      | 2,342   | 99 |
| 04-12-2021  | 143,557  | 1,566       | 142,053      | 5,524       | 0         | 0      | 58        | 2      | 2,910   | 98 |
| 05-12-2021  | 144,767  | 2,133       | 149,098      | 5,401       | <5        | 0      | 102       | 3      | 3,330   | 97 |
| 06-12-2021  | 228,350  | 2,882       | 211,711      | 7,546       | 0         | 0      | 211       | 5      | 4,206   | 95 |
| 07-12-2021  | 233,073  | 2,778       | 211,038      | 7,814       | 0         | 0      | 203       | 10     | 1,825   | 90 |
| 08-12-2021  | 239,456  | 2,885       | 207,141      | 7,088       | 0         | 0      | 199       | 11     | 1,533   | 89 |
| 09-12-2021  | 268,385  | 2,807       | 245,057      | 7,092       | 0         | 0      | 193       | 15     | 1,074   | 85 |
| 10-12-2021  | 274,849  | 2,596       | 213,063      | 7,427       | <5        | 0      | 202       | 12     | 1,462   | 88 |
| 11-12-2021  | 178,176  | 2,166       | 155,858      | 7,159       | 0         | 0      | 197       | 17     | 983     | 83 |
| 12-12-2021  | 178,068  | 3,087       | 167,670      | 7,669       | <5        | 0      | 238       | 20     | 937     | 80 |
| 13-12-2021  | 261,259  | 4,380       | 232,666      | 11,221      | 13        | 1      | 391       | 29     | 961     | 70 |
| 14-12-2021  | 254,258  | 4,529       | 225,263      | 12,157      | 16        | 2      | 405       | 44     | 499     | 54 |
| 15-12-2021  | 225,026  | 4,744       | 219,477      | 11,940      | 13        | 1      | 544       | 48     | 587     | 51 |
| 16-12-2021  | 255,302  | 4,676       | 258,490      | 11,316      | 19        | 2      | 498       | 46     | 563     | 52 |
| 17-12-2021  | 273,106  | 4,550       | 236,644      | 11,831      | 20        | 4      | 272       | 53     | 222     | 43 |
| 18-12-2021  | 221,579  | 4,305       | 176,424      | 11,350      | 32        | 4      | 519       | 57     | 360     | 40 |
| 19-12-2021  | 220,878  | 5,263       | 182,974      | 11,637      | 49        | 4      | 680       | 59     | 426     | 37 |
| 20-12-2021  | 248,231  | 6,379       | 271,191      | 15,093      | 70        | 6      | 752       | 64     | 355     | 30 |
| 21-12-2021  | 251,443  | 6,408       | 258,469      | 14,778      | 62        | 7      | 561       | 67     | 216     | 26 |
| 22-12-2021  | 275,255  | 6,172       | 272,965      | 13,584      | 52        | 8      | 476       | 71     | 139     | 21 |
| 23-12-2021  | 277,452  | 5,037       | 246,286      | 14,573      | 65        | 9      | 513       | 70     | 156     | 21 |
| 24-12-2021  | 155,248  | 4,466       | 72,578       | 8,253       | 24        | 8      | 200       | 67     | 74      | 25 |
| 25-12-2021  | 128,703  | 4,787       | 73,516       | 9,163       | 45        | 12     | 264       | 72     | 56      | 15 |
| 26-12-2021  | 168,399  | 6,072       | 82,131       | 12,212      | 114       | 16     | 502       | 70     | 105     | 15 |
| 27-12-2021  | 207,265  | 7,393       | 186,664      | 24,968      | 342       | 17     | 1,399     | 71     | 231     | 12 |
| 28-12-2021  | 213,340  | 7,253       | 195,094      | 24,145      | 232       | 17     | 1,019     | 72     | 155     | 11 |
| 29-12-2021  | 238,567  | 6,813       | 216,571      | 19,207      | 79        | 19     | 300       | 72     | 38      | 9  |
| 30-12-2021  | 314,614  | 6,387       | 229,325      | 21,573      | 144       | 17     | 632       | 74     | 82      | 10 |
| 31-12-2021  | 181,564  | 4,507       | 72,615       | 10,978      | 86        | 22     | 281       | 70     | 32      | 8  |
| 01-01-2022  | 70,576   | 3,248       | 75,054       | 9,821       | 117       | 26     | 318       | 70     | 21      | 5  |
| 02-01-2022  | 224,366  | 8,394       | 156,448      | 22,461      | 1,073     | 22     | 3,447     | 72     | 250     | 5  |
| 03-01-2022  | 239,585  | 9,284       | 224,060      | 28,810      | 552       | 25     | 1,528     | 70     | 108     | 5  |
| 04-01-2022  | 260,020  | 8,579       | 207,726      | 27,044      | 88        | 25     | 248       | 71     | 15      | 4  |
| 05-01-2022  | 225,865  | 6,023       | 186,594      | 20,330      | 383       | 26     | 1,034     | 70     | 53      | 4  |
| 06-01-2022  | 247,962  | 5,205       | 212,979      | 17,996      | 255       | 32     | 525       | 65     | 26      | 3  |
| 07-01-2022  | 240,998  | 4,777       | 185,196      | 16,690      | 774       | 35     | 1,414     | 63     | 46      | 2  |
| 08-01-2022  | 145,731  | 3,999       | 136,728      | 15,682      | 266       | 37     | 437       | 61     | 15      | 2  |
| 09-01-2022  | 204,489  | 5,890       | 151,107      | 18,550      | 199       | 41     | 277       | 57     | 14      | 3  |
| 10-01-2022  | 242,588  | 6,932       | 211,919      | 26,243      | 449       | 44     | 556       | 55     | 12      | 1  |
| 11-01-2022  | 238,640  | 6,548       | 197,537      | 25,646      | 201       | 47     | 225       | 53     | <5      | 0  |
| 12-01-2022  | 232,320  | 6,408       | 190,105      | 25,504      | -         | -      | -         | -      | -       | -  |
| 13-01-2022  | 255,218  | 7,167       | 225,495      | 26,775      | -         | -      | -         | -      | -       | -  |
| 14-01-2022  | 254,373  | 7,647       | 207,485      | 28,934      | -         | -      | -         | -      | -       | -  |
| 15-01-2022  | 158,305  | 6,738       | 158,450      | 28,218      | -         | -      | -         | -      | -       | -  |
| 16-01-2022  | 229,717  | 10,724      | 175,178      | 31,223      | -         | -      | -         | -      | -       | -  |
| 17-01-2022  | 275,634  | 11,886      | 251,447      | 45,876      | -         | -      | -         | -      | -       | -  |
| 18-01-2022  | 267,751  | 11,955      | 239,012      | 44,841      | -         | -      | -         | -      | -       | -  |
| 19-01-2022  | 250,051  | 10,857      | 226,241      | 42,031      | -         | -      | -         | -      | -       | -  |

Notes: This tables shows the number of antigen (AG) tests and RT-PCR tests in Denmark from 1 December 2021 to 19 January 2022. The table also provides information on the number of successfully sequenced positive RT-PCR tests by SARS-CoV-2 variant, including their relative proportion. On any given day, fewer than 5 of the successfully sequenced samples were classified as another variant than Omicron BA.2, Omicron BA.1, or Delta.

## 372 6.2 Sample selection to WGS

373 In Denmark, individuals can be tested in the community track (TestCenter Denmark) or  
374 in the healthcare track (Hospitals), which includes hospitalized patients, nursing home  
375 residents, and healthcare personnel (see Schønning et al. (2021) for elaboration). Only  
376 a proportion of all positive RT-PCR tests were sampled for whole genome sequencing  
377 (WGS). Both TestCenter Denmark and Hospitals sample positive RT-PCR tests ran-  
378 domly for WGS. However, all hospitalized patients were tested for SARS-CoV-2 and all  
379 positive tests were subject to WGS for treatment purposes. Figure 2 shows the sampling  
380 probability for WGS for within the study period by TestCenter Denmark and Hospitals.  
381 Panel a and b shows the sampling probability by age. For positive RT-PCR tests at  
382 TestCenter Denmark, there was no selection bias on age, whereas in hospitals, there was  
383 an increased sampling probability by age for young children and elderly. Panel c shows  
384 the sampling probability for WGS by sample Ct value for TestCenter Denmark (we only  
385 obtained Ct values from TestCenter Denmark). There was no sampling bias for Ct values  
386  $< 35$ . The probability of obtaining a successfully sequenced genome was correlated with  
387 the sample Ct value.

Figure 2: WGS sampling probability of positive RT-PCR tests

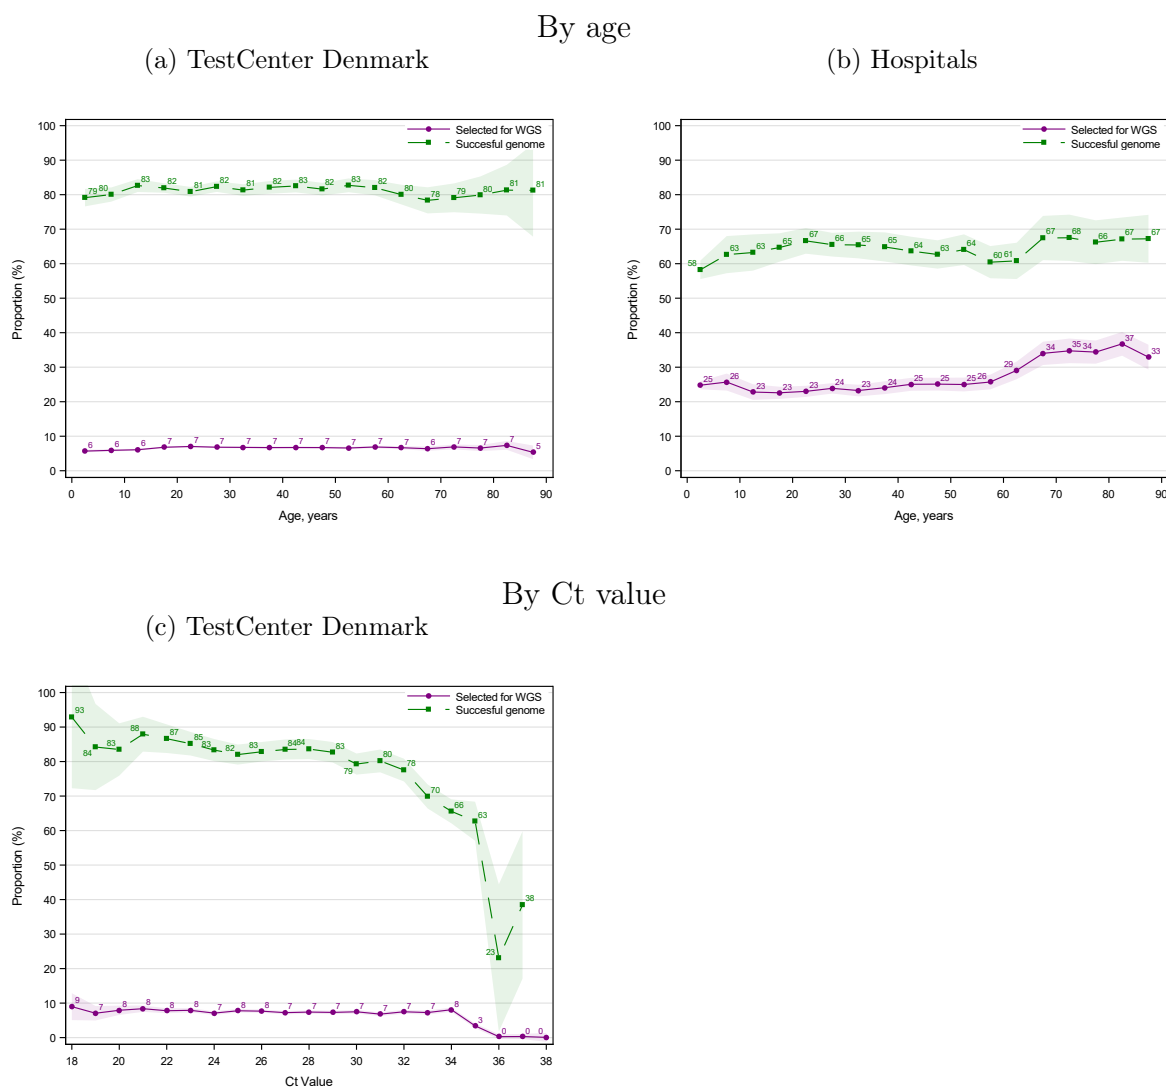

Notes: This figure shows the sampling probability of positive RT-PCR tests for WGS by testing place (TestCenter Denmark and Hospitals). Only Ct values from TestCenter Denmark were available. The shaded areas show the 95% confidence bands clustered on the household level.

## 388 7 Descriptive analyses

### 389 7.1 Summary statistics

390 In this section, we present additional summary statistics.

Table 5: Summary Statistics

|                                       | Omicron - BA.2 |                           |                          |         | Omicron - BA.1 |                           |                          |         |
|---------------------------------------|----------------|---------------------------|--------------------------|---------|----------------|---------------------------|--------------------------|---------|
|                                       | Primary Cases  | Potential Secondary Cases | Positive Secondary Cases | SAR (%) | Primary Cases  | Potential Secondary Cases | Positive Secondary Cases | SAR (%) |
| <b>Total, N</b>                       | 2,122          | 4,587                     | 1,792                    | 39      | 6,419          | 13,358                    | 3,910                    | 29      |
| <b>Sex, N</b>                         |                |                           |                          |         |                |                           |                          |         |
| Male                                  | 1,032          | 2,312                     | 871                      | 38      | 3,174          | 6,724                     | 1,882                    | 28      |
| Female                                | 1,090          | 2,275                     | 921                      | 40      | 3,245          | 6,634                     | 2,028                    | 31      |
| <b>Age, N</b>                         |                |                           |                          |         |                |                           |                          |         |
| 0-10                                  | 180            | 799                       | 336                      | 42      | 302            | 2,280                     | 747                      | 33      |
| 10-20                                 | 523            | 845                       | 289                      | 34      | 1,468          | 2,556                     | 673                      | 26      |
| 20-30                                 | 484            | 633                       | 240                      | 38      | 1,714          | 2,056                     | 633                      | 31      |
| 30-40                                 | 328            | 573                       | 321                      | 56      | 958            | 1,408                     | 595                      | 42      |
| 40-50                                 | 241            | 804                       | 303                      | 38      | 784            | 2,393                     | 650                      | 27      |
| 50-60                                 | 225            | 660                       | 213                      | 32      | 692            | 1,838                     | 400                      | 22      |
| 60-70                                 | 79             | 175                       | 61                       | 35      | 324            | 572                       | 145                      | 25      |
| 70+                                   | 62             | 98                        | 29                       | 30      | 177            | 255                       | 67                       | 26      |
| <b>Household size, N</b>              |                |                           |                          |         |                |                           |                          |         |
| 2                                     | 790            | 790                       | 345                      | 44      | 2,577          | 2,577                     | 853                      | 33      |
| 3                                     | 517            | 1,034                     | 378                      | 37      | 1,605          | 3,210                     | 862                      | 27      |
| 4                                     | 550            | 1,650                     | 683                      | 41      | 1,504          | 4,512                     | 1,379                    | 31      |
| 5                                     | 212            | 848                       | 292                      | 34      | 606            | 2,424                     | 667                      | 28      |
| 6                                     | 53             | 265                       | 94                       | 35      | 127            | 635                       | 149                      | 23      |
| <b>Immunity, N</b>                    |                |                           |                          |         |                |                           |                          |         |
| Unvaccinated                          | 449            | 1,210                     | 518                      | 43      | 1,016          | 3,421                     | 1,171                    | 34      |
| Fully vaccinated / previous infection | 1,114          | 1,917                     | 783                      | 41      | 3,781          | 5,921                     | 1,856                    | 31      |
| Booster vaccinated                    | 559            | 1,460                     | 491                      | 34      | 1,622          | 4,016                     | 883                      | 22      |

Notes: The secondary attack rate (SAR) is expressed as a percentage (%). Summary statistics based on primary cases are shown separately from summary statistics on potential secondary cases, positive secondary cases and SAR. The summary statistics stratified by the primary case level are presented in appendix Tables 6 and 7.

Table 6: Summary Statistics, stratified by primary case level

|                                          | Omicron - BA.2 |                           |                          |         | Omicron - BA.1 |                           |                          |         |
|------------------------------------------|----------------|---------------------------|--------------------------|---------|----------------|---------------------------|--------------------------|---------|
|                                          | Primary Cases  | Potential Secondary Cases | Positive Secondary Cases | SAR (%) | Primary Cases  | Potential Secondary Cases | Positive Secondary Cases | SAR (%) |
| <b>Total, N</b>                          | 2,122          | 4,587                     | 1,792                    | 39      | 6,419          | 13,358                    | 3,910                    | 29      |
| <b>Sex of primary case, %</b>            |                |                           |                          |         |                |                           |                          |         |
| Male                                     | 49             | 49                        | 49                       | 38      | 49             | 50                        | 49                       | 29      |
| Female                                   | 51             | 51                        | 51                       | 40      | 51             | 50                        | 51                       | 30      |
| <b>Age of primary case, %</b>            |                |                           |                          |         |                |                           |                          |         |
| 0-10                                     | 8              | 11                        | 18                       | 65      | 5              | 6                         | 9                        | 43      |
| 10-20                                    | 25             | 30                        | 21                       | 28      | 23             | 28                        | 18                       | 19      |
| 20-30                                    | 23             | 19                        | 16                       | 32      | 27             | 22                        | 18                       | 24      |
| 30-40                                    | 15             | 17                        | 19                       | 44      | 15             | 17                        | 22                       | 38      |
| 40-50                                    | 11             | 12                        | 14                       | 45      | 12             | 14                        | 17                       | 36      |
| 50-60                                    | 11             | 7                         | 8                        | 42      | 11             | 8                         | 9                        | 33      |
| 60-70                                    | 4              | 2                         | 2                        | 41      | 5              | 3                         | 4                        | 38      |
| 70+                                      | 3              | 1                         | 2                        | 42      | 3              | 1                         | 2                        | 37      |
| <b>Household size of primary case, %</b> |                |                           |                          |         |                |                           |                          |         |
| 2                                        | 37             | 17                        | 19                       | 44      | 40             | 19                        | 22                       | 33      |
| 3                                        | 24             | 23                        | 21                       | 37      | 25             | 24                        | 22                       | 27      |
| 4                                        | 26             | 36                        | 38                       | 41      | 23             | 34                        | 35                       | 31      |
| 5                                        | 10             | 18                        | 16                       | 34      | 9              | 18                        | 17                       | 28      |
| 6                                        | 2              | 6                         | 5                        | 35      | 2              | 5                         | 4                        | 23      |
| <b>Immunity of primary case, %</b>       |                |                           |                          |         |                |                           |                          |         |
| Unvaccinated                             | 21             | 24                        | 30                       | 50      | 16             | 18                        | 21                       | 34      |
| Fully vaccinated / previous infection    | 52             | 55                        | 49                       | 35      | 59             | 61                        | 59                       | 28      |
| Booster vaccinated                       | 26             | 22                        | 21                       | 38      | 25             | 21                        | 20                       | 28      |

Notes: The secondary attack rate (SAR) is expressed as a percentage (%). Potential and positive secondary cases are grouped based on the primary case characteristics. See Table 1 and appendix Table 5 for potential and positive secondary cases grouped by their own characteristics.



Table 7: Summary Statistics, stratified by primary case level

|                                          | Omicron - BA.2 |                           |                          |         | Omicron - BA.1 |                           |                          |         |
|------------------------------------------|----------------|---------------------------|--------------------------|---------|----------------|---------------------------|--------------------------|---------|
|                                          | Primary Cases  | Potential Secondary Cases | Positive Secondary Cases | SAR (%) | Primary Cases  | Potential Secondary Cases | Positive Secondary Cases | SAR (%) |
| <b>Total, N</b>                          | 2,122          | 4,587                     | 1,792                    | 39      | 6,419          | 13,358                    | 3,910                    | 29      |
| <b>Sex of primary case, N</b>            |                |                           |                          |         |                |                           |                          |         |
| Male                                     | 1,032          | 2,270                     | 873                      | 38      | 3,174          | 6,643                     | 1,928                    | 29      |
| Female                                   | 1,090          | 2,317                     | 919                      | 40      | 3,245          | 6,715                     | 1,982                    | 30      |
| <b>Age of primary case, N</b>            |                |                           |                          |         |                |                           |                          |         |
| 0-10                                     | 180            | 495                       | 324                      | 65      | 302            | 828                       | 353                      | 43      |
| 10-20                                    | 523            | 1,360                     | 375                      | 28      | 1,468          | 3,782                     | 720                      | 19      |
| 20-30                                    | 484            | 873                       | 278                      | 32      | 1,714          | 2,903                     | 707                      | 24      |
| 30-40                                    | 328            | 783                       | 348                      | 44      | 958            | 2,242                     | 860                      | 38      |
| 40-50                                    | 241            | 572                       | 256                      | 45      | 784            | 1,886                     | 681                      | 36      |
| 50-60                                    | 225            | 342                       | 144                      | 42      | 692            | 1,134                     | 369                      | 33      |
| 60-70                                    | 79             | 95                        | 39                       | 41      | 324            | 391                       | 149                      | 38      |
| 70+                                      | 62             | 67                        | 28                       | 42      | 177            | 192                       | 71                       | 37      |
| <b>Household size of primary case, N</b> |                |                           |                          |         |                |                           |                          |         |
| 2                                        | 790            | 790                       | 345                      | 44      | 2,577          | 2,577                     | 853                      | 33      |
| 3                                        | 517            | 1,034                     | 378                      | 37      | 1,605          | 3,210                     | 862                      | 27      |
| 4                                        | 550            | 1,650                     | 683                      | 41      | 1,504          | 4,512                     | 1,379                    | 31      |
| 5                                        | 212            | 848                       | 292                      | 34      | 606            | 2,424                     | 667                      | 28      |
| 6                                        | 53             | 265                       | 94                       | 35      | 127            | 635                       | 149                      | 23      |
| <b>Immunity of primary case, N</b>       |                |                           |                          |         |                |                           |                          |         |
| Unvaccinated                             | 449            | 1,083                     | 543                      | 50      | 1,016          | 2,417                     | 816                      | 34      |
| Fully vaccinated / previous infection    | 1,114          | 2,507                     | 875                      | 35      | 3,781          | 8,152                     | 2,315                    | 28      |
| Booster vaccinated                       | 559            | 997                       | 374                      | 38      | 1,622          | 2,789                     | 779                      | 28      |

Notes: The secondary attack rate (SAR) is expressed as a percentage (%). Potential and positive secondary cases are grouped based on the primary case characteristics. See Table 1 and appendix Table 5 for potential and positive secondary cases grouped by their own characteristics.

## 391 7.2 Testing dynamics, 14-day follow-up

392 In this section, we present evidence of the testing dynamics over a 14-day follow-up period.  
 393 Figure 3 presents the probability of being tested and testing positive over a 14-day follow-  
 394 up period instead of a 7-day follow-up period, as used in Figure 1. Figure 4 presents the  
 395 SAR for households infected with the Omicron BA.1, BA.2, and Delta VOC, as well as  
 396 those without an identified variant.

Figure 3: Probability of being tested and testing positive, 14-day follow-up

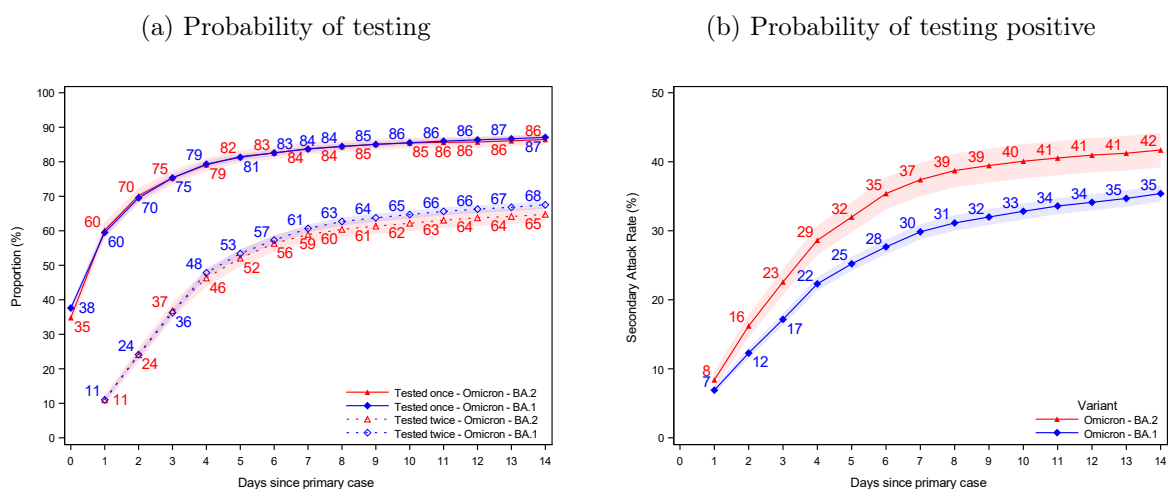

Notes: Panel (a) shows the probability of potential secondary cases being tested after a primary case has been identified within the household. Panel (b) shows the probability of potential secondary cases that test positive subsequently to a primary case being identified within the household. Note that the latter is not conditional on being tested, i.e. the denominator contains test negative individuals and untested individuals. The x-axes shows the days since the primary case tested positive, and the y-axes shows the proportion of individuals either being tested (a) or testing positive (b) with either antigen or RT-PCR tests, based on the subvariant of the primary case. The SAR for each day relative to the primary case can be read directly from panel (b). For example, the SAR on day 7 is 37% for BA.2 (red) and 30% for BA.1 (blue), whereas the SAR on day 14 is 42% and 35%, respectively. The shaded areas show the 95% confidence bands clustered on the household level. To allow for a 14-day follow-up, only primary cases with samples from 20 December 2021 to 5 January 2022 were included in this figure. Appendix Figure 4 also presents the 14-day SAR for the Delta VOC and those without a known variant.

Figure 4: Probability of testing positive, 14-day follow-up

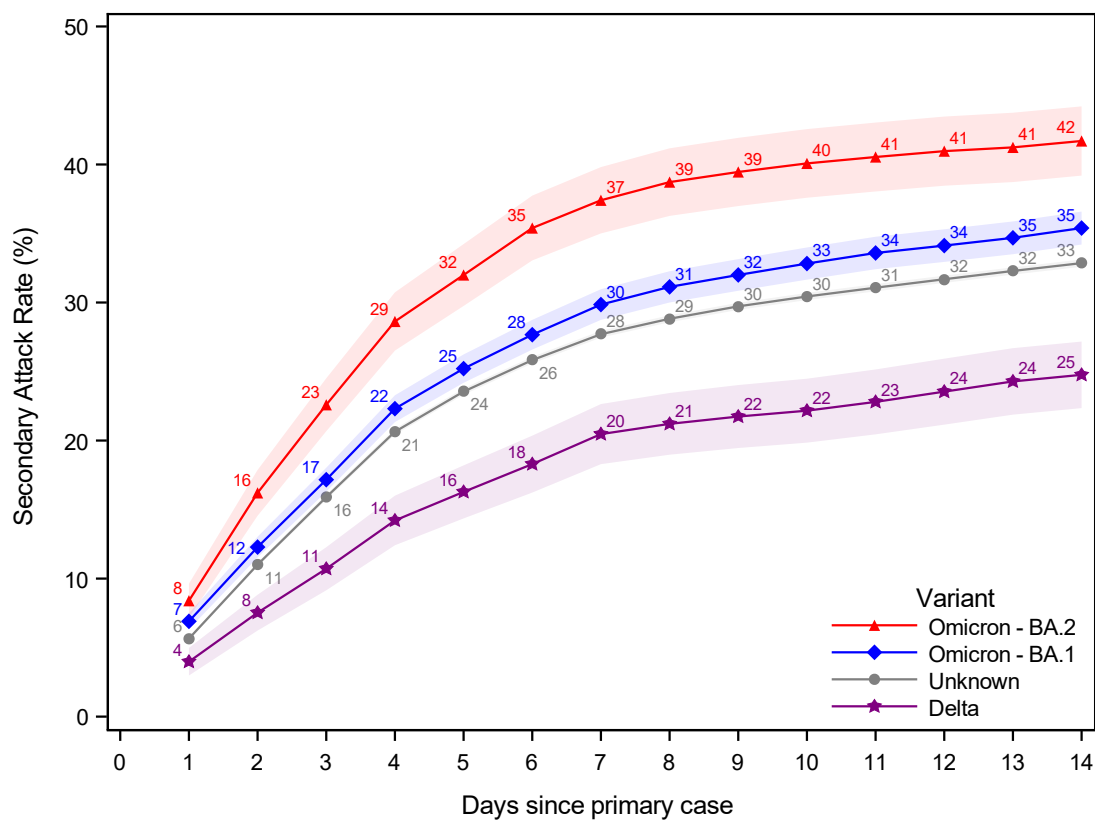

Notes: This figure shows the probability of potential secondary cases that test positive subsequently to a primary case being identified within the household in a 14-day follow-up period. Note that the latter is not conditional on being tested, i.e. the denominator contains test negative individuals and untested individuals. The x-axis shows the days since the primary case tested positive, and the y-axis shows the proportion of individuals testing positive with either antigen or RT-PCR tests, based on the subvariant of the primary case. The SAR for each day relative to the primary case can be read directly from the figure. For example, the SAR on day 14 is 42% for Omicron BA.2, 35% for BA.1, 33% for those without a known variant, and 25% for Delta. The shaded areas show the 95% confidence bands clustered on the household level. To allow for a 14-day follow-up, only primary cases with samples from 20 December 2021 to 5 January 2022 were included in this figure.

### 397 7.3 Viral load of primary cases

398 This section provides descriptive statistics on the viral load of the primary case samples.  
 399 Figure 5 shows the density plots of sample Ct values for primary cases infected with  
 400 Omicron BA.1 and BA.2 stratified by their vaccination status. The distributional values  
 401 are presented in Table 8. In particular, unvaccinated primary cases infected with BA.2  
 402 have a higher sample viral load (lower Ct value), with the median primary case having a  
 403 1.6 point lower sample Ct value, corresponding to 0.4 of a standard deviation.

Figure 5: Ct values of primary cases

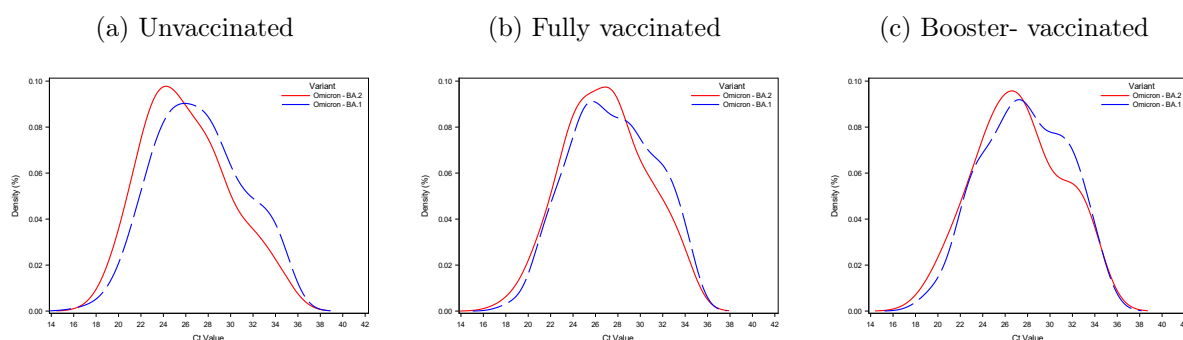

Notes: This figure shows the density plots for primary cases infected with Omicron BA.1 and BA.2 stratified by their vaccination status.

Table 8: Ct values of primary cases

| Vaccination status | Subvariant       | Q1    | Median | Q3    | Mean  | STD  | N     |
|--------------------|------------------|-------|--------|-------|-------|------|-------|
| Booster vaccinated | Omicron - BA.1   | 25.01 | 27.65  | 30.80 | 27.72 | 3.71 | 1,622 |
|                    | Omicron - BA.2   | 24.48 | 27.09  | 30.06 | 27.20 | 3.82 | 559   |
|                    | Difference / STD | -0.14 | -0.14  | -0.19 | -0.13 |      |       |
| Fully vaccinated   | Omicron - BA.1   | 24.65 | 27.33  | 30.48 | 27.50 | 3.76 | 3,781 |
|                    | Omicron - BA.2   | 24.10 | 26.97  | 29.47 | 26.88 | 3.68 | 1,114 |
|                    | Difference / STD | -0.15 | -0.09  | -0.26 | -0.16 |      |       |
| Not vaccinated     | Omicron - BA.1   | 24.14 | 27.02  | 29.97 | 27.20 | 3.91 | 1,016 |
|                    | Omicron - BA.2   | 23.20 | 25.42  | 28.55 | 26.07 | 3.80 | 449   |
|                    | Difference / STD | -0.24 | -0.41  | -0.36 | -0.29 |      |       |

Notes: This table provides distributional values for the Ct values of primary case samples. "Difference / STD" denotes the difference of primary cases with BA.2 and BA.1 relative to the standard deviation of BA.1 primary cases, within vaccination group.

## 404 8 Alternative presentation of main results

### 405 8.1 Contrasts

406 In this section, we present some of our main estimates in an alternative way, showing the  
407 estimates for comparison of different vaccination groups.

408 Figure 6 shows a full comparison of our main estimates across vaccination groups with  
409 different reference groups. We can see the relative effect of vaccination dependent on their  
410 vaccination status by choosing the *Contrast* (column) and compare their *Transmissibility*  
411 to the vaccination status of a similar primary case by choosing the *Reference* (row). For  
412 example, unvaccinated primary cases (Contrast=unvaccinated) compared to fully vacci-  
413 nated primary cases (Reference=fully vaccinated) have an increased transmissibility of  
414 OR=1.13 when infected with BA.1 (blue) and OR=1.23 when infected with BA.2 (red).  
415 The interaction term of BA.2 on transmissibility has an OR=1.09 (black). This inter-  
416 action term can be interpreted as the additional OR associated with BA.2 (relative to  
417 BA.1) within the comparison. Similarly, we can see the relative transmissibility for unvac-  
418 cinated primary cases (Contrast=unvaccinated) compared to booster-vaccinated primary  
419 cases (Reference=booster). Primary cases with BA.1 have an OR=1.36 for transmissibil-  
420 ity and primary cases with BA.2 have an OR=1.53 for transmissibility. The interaction  
421 term is OR=1.12. The estimates for *Susceptibility* is read in a similar way, but for po-  
422 tential secondary cases. Lastly, the *Combined* effect of vaccination shows the effect of  
423 both the primary case and potential secondary case having the same vaccination status.  
424 Thus, for households infected with BA.1, the OR=1.40 if both the primary case and  
425 potential secondary case are unvaccinated (Contrast=Unvaccinated) compared to when  
426 both are fully vaccinated (Reference=Fully vaccinated). Note, the model estimates for  
427 reference=Fully vaccinated are found in Table 10.

428 Table 9 shows the OR for infection with BA.2 compared to BA.1 for each combination of  
429 vaccination status of both the primary case and potential secondary case. The relative  
430 transmission of BA.2 compared to BA.1 is higher across all combinations of vaccination

431 groups. The relative transmission of BA.2 compared to BA.1 is generally higher for un-  
432 vaccinated primary cases across all vaccination groups of potential secondary cases.

433 Table 10 shows the model estimates (similar to Table 12, model I) with interaction terms  
434 instead of a full specification of contrasts.

Figure 6: Effect of vaccination, contrast plot

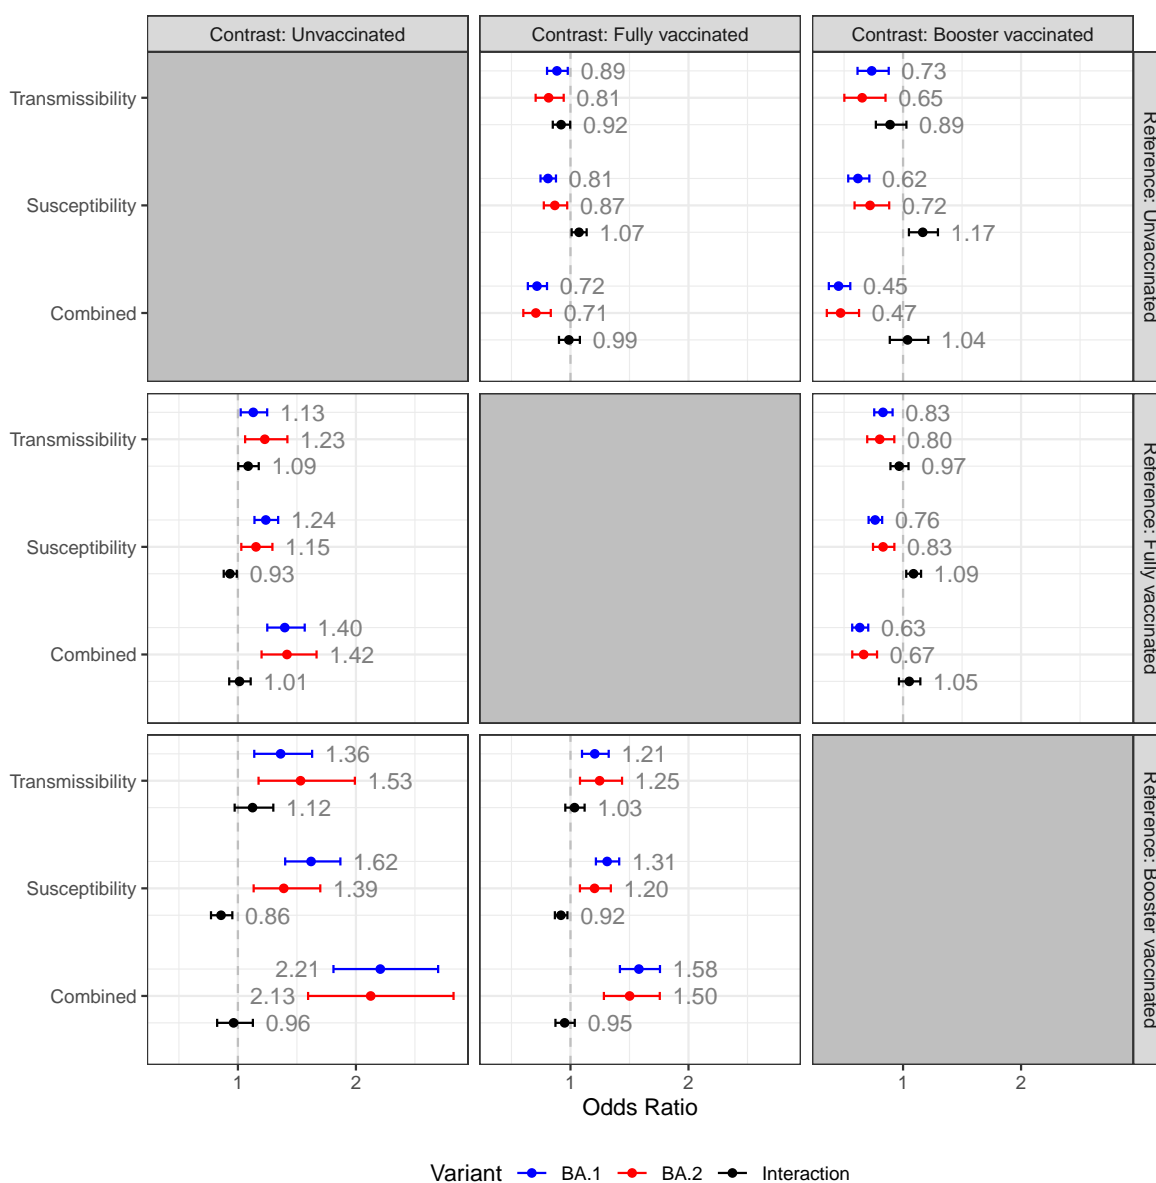

Notes: This figure shows a full comparison of our main estimates across vaccination groups with different reference groups. We can see the relative effect of vaccination dependent on their vaccination status by choosing the *Contrast* (column) and compare their *Transmissibility* to the vaccination status of a similar primary case by choosing the *Reference* (row). For example, unvaccinated primary cases (Contrast=unvaccinated) compared to fully vaccinated primary cases (Reference=fully vaccinated) have an increased transmissibility of OR=1.13 when infected with BA.1 (blue) and OR=1.23 when infected with BA.2 (red). The interaction term of BA.2 on transmissibility has an OR=1.09 (black). This interaction term can be interpreted as the additional OR associated with BA.2 (relative to BA.1) within the comparison. Note that the top/right subplots are simply the inverse of the lower/left subplots. 95%-confidence intervals. Standard errors are clustered on the household level.

Table 9: OR estimates of BA.2 compared to BA.1 by vaccination status

|                                 | Primary Case        |                     |                     |
|---------------------------------|---------------------|---------------------|---------------------|
|                                 | Unvaccinated        | Fully vaccinated    | Booster-vaccinated  |
| <b>Potential secondary case</b> |                     |                     |                     |
| Unvaccinated                    | 1.31<br>(1.17-1.46) | 1.21<br>(1.11-1.31) | 1.17<br>(1.03-1.32) |
| Fully vaccinated                | 1.41<br>(1.27-1.55) | 1.29<br>(1.23-1.36) | 1.25<br>(1.13-1.38) |
| Booster-vaccinated              | 1.53<br>(1.35-1.73) | 1.41<br>(1.31-1.52) | 1.36<br>(1.23-1.51) |

Notes: This table shows the OR for BA.2 compared to BA.1 for each combination of vaccination status of both the primary case and potential secondary case. 95% confidence intervals in parentheses. Standard errors clustered on the household level.

### 435 Method for estimating the contrast

436 To estimate the contrast, we used the estimates and variance-covariance matrix from the  
 437 fitted model (Table 10) to generate 10,000 correlated Monte Carlo estimates of the model  
 438 parameters. These estimates were then used to calculate log odds ratios representing the  
 439 total effect of BA.2 compared to BA.1 for all possible pairwise contrasts within vaccination  
 440 groups. This was done for transmissibility and susceptibility, as well as a combined  
 441 effect calculated as the sum of these. In addition, the interaction between subvariant  
 442 and vaccination group was also calculated for each pairwise contrast within vaccination  
 443 groups. Results were summarised as mean and 95%-confidence intervals of the estimates,  
 444 before exponentiation for interpretation as odds ratios (Figure 6). These analyses were  
 445 performed in R version 4.1.2 (R Core Team, 2021).



Table 10: Model estimates

|                                                     | Estimate | (95%-CI)      |
|-----------------------------------------------------|----------|---------------|
| Intercept                                           | -0.58    | (-0.68;-0.48) |
| Omicron BA.2                                        | 0.26     | (0.21;0.31)   |
| <b>Potential secondary case, vaccination status</b> |          |               |
| Booster-vaccinated                                  | -0.27    | (-0.35;-0.19) |
| Fully vaccinated                                    | ref      | (.)           |
| Not-vaccinated                                      | 0.21     | (0.13;0.29)   |
| <b>Primary case, vaccination status</b>             |          |               |
| Booster-vaccinated                                  | -0.19    | (-0.28;-0.09) |
| Fully vaccinated                                    | ref      | (.)           |
| Not-vaccinated                                      | 0.12     | (0.02;0.22)   |
| <b>Potential secondary case, vaccination status</b> |          |               |
| Omicron BA.2 X Booster-vaccinated                   | 0.08     | (0.03;0.14)   |
| Omicron BA.2 X Fully vaccinated                     | ref      | (.)           |
| Omicron BA.2 X Not-vaccinated                       | -0.07    | (-0.13;-0.01) |
| <b>Primary case, vaccination status</b>             |          |               |
| Omicron BA.2 X Booster-vaccinated                   | -0.03    | (-0.11;0.04)  |
| Omicron BA.2 X Fully vaccinated                     | ref      | (.)           |
| Omicron BA.2 X Not-vaccinated                       | 0.08     | (0.01;0.16)   |
| <b>Primary case age</b>                             |          |               |
| 0-10                                                | 0.30     | (0.12;0.49)   |
| 10-20                                               | -0.76    | (-0.88;-0.64) |
| 20-30                                               | ref      | (.)           |
| 30-40                                               | -0.06    | (-0.18;0.06)  |
| 40-50                                               | 0.09     | (-0.03;0.21)  |
| 50-60                                               | 0.03     | (-0.10;0.17)  |
| 60-70                                               | 0.38     | (0.17;0.59)   |
| 70+                                                 | 0.71     | (0.38;1.04)   |
| <b>Potential secondary case age</b>                 |          |               |
| 0-10                                                | -0.11    | (-0.23;0.02)  |
| 10-20                                               | -0.12    | (-0.22;-0.02) |
| 20-30                                               | ref      | (.)           |
| 30-40                                               | 0.48     | (0.37;0.58)   |
| 40-50                                               | 0.26     | (0.16;0.36)   |
| 50-60                                               | 0.00     | (-0.11;0.11)  |
| 60-70                                               | -0.18    | (-0.35;-0.01) |
| 70+                                                 | -0.56    | (-0.84;-0.27) |
| <b>Household size</b>                               |          |               |
| 2                                                   | 0.27     | (0.18;0.36)   |
| 3                                                   | -0.02    | (-0.11;0.06)  |
| 4                                                   | 0.07     | (-0.01;0.15)  |
| 5                                                   | -0.08    | (-0.19;0.03)  |
| 6                                                   | ref      | (.)           |
| <b>Primary case sex</b>                             |          |               |
| Male                                                | ref      | (.)           |
| Female                                              | 0.14     | (0.07;0.20)   |
| <b>Potential secondary case sex</b>                 |          |               |
| Male                                                | ref      | (.)           |
| Female                                              | 0.06     | (-0.02;0.15)  |
| <b>Primary case sample date</b>                     |          |               |
| 20DEC2021                                           | -0.15    | (-0.34;0.05)  |
| 21DEC2021                                           | 0.02     | (-0.21;0.24)  |
| 22DEC2021                                           | 0.15     | (-0.08;0.39)  |
| 23DEC2021                                           | 0.09     | (-0.17;0.34)  |
| 24DEC2021                                           | 0.20     | (-0.20;0.59)  |
| 25DEC2021                                           | 0.46     | (0.12;0.80)   |
| 26DEC2021                                           | 0.20     | (-0.08;0.47)  |
| 27DEC2021                                           | 0.06     | (-0.10;0.23)  |
| 28DEC2021                                           | -0.01    | (-0.19;0.18)  |
| 29DEC2021                                           | 0.14     | (-0.16;0.44)  |
| 30DEC2021                                           | -0.04    | (-0.26;0.18)  |
| 31DEC2021                                           | ref      | (.)           |
| 01JAN2022                                           | -0.03    | (-0.32;0.25)  |
| 02JAN2022                                           | -0.05    | (-0.16;0.05)  |
| 03JAN2022                                           | -0.09    | (-0.23;0.05)  |
| 04JAN2022                                           | -0.16    | (-0.48;0.15)  |
| 05JAN2022                                           | -0.36    | (-0.54;-0.19) |
| 06JAN2022                                           | -0.21    | (-0.43;0.00)  |
| 07JAN2022                                           | -0.15    | (-0.29;-0.01) |
| 08JAN2022                                           | -0.09    | (-0.32;0.14)  |
| 09JAN2022                                           | 0.00     | (-0.24;0.24)  |
| 10JAN2022                                           | -0.04    | (-0.21;0.14)  |
| 11JAN2022                                           | 0.02     | (-0.26;0.31)  |
| Number of observations                              | 17,945   |               |
| Number of households                                | 8,541    |               |

Notes: This table provides model estimates of our main specification (model 1) with an interaction effect. 95% confidence intervals are shown in parentheses. Standard errors are clustered on the household level.

## 446 9 Robustness

### 447 9.1 Model selection

Table 11: Model selection

| Model                                                                | I      | II     | III    | IV     |
|----------------------------------------------------------------------|--------|--------|--------|--------|
| AIC                                                                  | 21,245 | 21,249 | 21,260 | 21,263 |
| Omicron BA.2 household                                               | YES    | YES    | YES    | YES    |
| Potential secondary case vaccination status                          | YES    | YES    | YES    | YES    |
| Primary case vaccination status                                      | YES    | YES    | YES    | YES    |
| Potential secondary case vaccination status X Omicron BA.2 household | YES    | YES    | NO     | NO     |
| Primary case vaccination status X Omicron BA.2 household             | YES    | NO     | YES    | NO     |
| Primary case age                                                     | YES    | YES    | YES    | YES    |
| Potential secondary case age                                         | YES    | YES    | YES    | YES    |
| Household size                                                       | YES    | YES    | YES    | YES    |
| Primary case sex                                                     | YES    | YES    | YES    | YES    |
| Potential secondary case sex                                         | YES    | YES    | YES    | YES    |
| Number of observations                                               | 17,945 | 17,945 | 17,945 | 17,945 |
| Number of households                                                 | 8,541  | 8,541  | 8,541  | 8,541  |

Notes: This table provides estimates of the goodness of fit for the model. Model I includes an interaction with Omicron BA.2 both for susceptibility and transmissibility, and is the one used in the study. Model II includes an interaction with Omicron BA.2 only for susceptibility. Model III includes an interaction with Omicron BA.2 only for transmissibility. Model IV includes neither an interaction with Omicron BA.2 only for susceptibility nor transmissibility. AIC = Akaike information criterion.

### 448 9.2 Intra-household correlation of variants

449 An obvious concern in transmission studies is the linkage of primary cases to their potential  
450 secondary cases and positive secondary cases. In previous studies we have used the same  
451 method as in the current study (Lyngse et al., 2021a,b). In those studies, we investigated  
452 the household transmission between different SARS-CoV-2 variants and found an intra-  
453 household correlation of variants (i.e. the probability that a positive secondary case was  
454 infected with the same variant as the primary case) of 96-99%. In the present study, we  
455 are limited by only having a low number of positive secondary cases with a successfully  
456 sequenced genome. This is due to both the laboratory time needed from a positive test  
457 result to having a successfully sequenced genome from the sample and a relatively low  
458 sampling probability for WGS. Of all the 5,702 positive secondary samples in the current  
459 study, only 23 of them had a successfully sequenced genome at the time of analysis. All  
460 of these 23 samples were the exact same subvariant as the primary case, implying an  
461 intra-household correlation of subvariants of 100%.

### 462 **9.3 Robustness of main results**

463 This section provides additional analyses to investigate the robustness of our main results.  
464 Model I in Tables 12 and 13 provides the odds ratio (OR) estimates of our main model  
465 specification. In model II, we only include households with primary cases identified in the  
466 period 5-11 January 2022, in order to exclude the atypical transmission patterns between  
467 Christmas 2021 and New Year's Eve 2021/22. In model III, we only include households,  
468 where the primary cases have been identified by TestCenter Denmark to account for  
469 the potential sampling bias from the healthcare track (Section 6.2). In model IV, we  
470 only include households with two persons to account for the natural weighting bias from  
471 different sizes of households. In model V, we exclude households, where the primary case  
472 was below 10 years of age. In model VI, we exclude households that have previously  
473 been infected (defined by having a positive RT-PCR test), to exclude possible hybrid  
474 immunity (i.e. immunity from both vaccination and previous infection). In model VII,  
475 we only include positive secondary cases that tested positive on day 2-7 (in model I, this  
476 window is 1-7), as these could potentially be misclassified co-primary cases. Similarly, in  
477 model VIII, we only include positive secondary cases that tested positive on day 3-7. In  
478 model IX, we additionally adjust for the primary case sample Ct value, as differences in  
479 the viral load could potentially affect the results.

480 To investigate the sensitivity of our results presented in Table 3, we estimated our model  
481 by stratifying the sample (Table 14).

Table 12: Robustness I

| Model                                               | I      |               | II              |                  | III     |                         | IV          |                     | V          |                         |
|-----------------------------------------------------|--------|---------------|-----------------|------------------|---------|-------------------------|-------------|---------------------|------------|-------------------------|
|                                                     | OR     | Main (95%-CI) | 5-11 January OR | January (95%-CI) | Only OR | Test Center DK (95%-CI) | 2-person OR | households (95%-CI) | Primary OR | cases >10years (95%-CI) |
| <b>Potential secondary case, vaccination status</b> |        |               |                 |                  |         |                         |             |                     |            |                         |
| <i>Omicron BA.1 households</i>                      |        |               |                 |                  |         |                         |             |                     |            |                         |
| Booster-vaccinated                                  | 0.65   | (0.58-0.73)   | 0.57            | (0.46-0.70)      | 0.61    | (0.54-0.70)             | 0.89        | (0.71-1.12)         | 0.65       | (0.58-0.73)             |
| Fully vaccinated                                    | ref    | (.)           | ref             | (.)              | ref     | (.)                     | ref         | (.)                 | ref        | (.)                     |
| Not-vaccinated                                      | 1.23   | (1.09-1.40)   | 1.27            | (1.01-1.60)      | 1.24    | (1.08-1.43)             | 0.97        | (0.71-1.33)         | 1.20       | (1.05-1.36)             |
| <i>Omicron BA.2 households</i>                      |        |               |                 |                  |         |                         |             |                     |            |                         |
| Not-vaccinated                                      | 1.95   | (1.37-2.78)   | 1.95            | (1.19-3.20)      | 1.72    | (1.16-2.55)             | 2.29        | (1.00-5.23)         | 1.29       | (0.84-2.00)             |
| Fully vaccinated                                    | 2.45   | (1.77-3.40)   | 2.46            | (1.57-3.85)      | 2.04    | (1.42-2.94)             | 2.36        | (1.08-5.15)         | 1.70       | (1.12-2.56)             |
| Not-vaccinated                                      | 2.70   | (1.95-3.74)   | 2.57            | (1.63-4.03)      | 2.59    | (1.81-3.72)             | 2.05        | (1.01-4.17)         | 1.84       | (1.23-2.75)             |
| <b>Primary case, vaccination status</b>             |        |               |                 |                  |         |                         |             |                     |            |                         |
| <i>Omicron BA.1 households</i>                      |        |               |                 |                  |         |                         |             |                     |            |                         |
| Booster-vaccinated                                  | 0.77   | (0.67-0.88)   | 0.85            | (0.65-1.12)      | 0.74    | (0.63-0.86)             | 0.72        | (0.57-0.90)         | 0.76       | (0.66-0.87)             |
| Fully vaccinated                                    | ref    | (.)           | ref             | (.)              | ref     | (.)                     | ref         | (.)                 | ref        | (.)                     |
| Not-vaccinated                                      | 0.93   | (0.80-1.08)   | 1.11            | (0.85-1.44)      | 0.94    | (0.80-1.11)             | 1.00        | (0.74-1.36)         | 0.96       | (0.82-1.12)             |
| <i>Omicron BA.2 households</i>                      |        |               |                 |                  |         |                         |             |                     |            |                         |
| Booster-vaccinated                                  | 0.47   | (0.32-0.71)   | 0.55            | (0.31-0.97)      | 0.51    | (0.33-0.81)             | 0.52        | (0.22-1.22)         | 0.69       | (0.43-1.11)             |
| Fully vaccinated                                    | 0.60   | (0.42-0.85)   | 0.70            | (0.42-1.14)      | 0.69    | (0.47-1.01)             | 0.67        | (0.30-1.48)         | 0.89       | (0.58-1.36)             |
| Not-vaccinated                                      | ref    | (.)           | ref             | (.)              | ref     | (.)                     | ref         | (.)                 | ref        | (.)                     |
| <b>Primary case age</b>                             |        |               |                 |                  |         |                         |             |                     |            |                         |
| 0-10                                                | 2.69   | (2.18-3.33)   | 2.29            | (1.67-3.15)      | 2.43    | (1.91-3.09)             | 2.27        | (1.20-4.29)         | -          | -                       |
| 10-20                                               | 0.93   | (0.81-1.07)   | 0.83            | (0.65-1.07)      | 0.92    | (0.79-1.07)             | 0.72        | (0.52-1.01)         | 0.91       | (0.79-1.06)             |
| 20-30                                               | ref    | (.)           | ref             | (.)              | ref     | (.)                     | ref         | (.)                 | ref        | (.)                     |
| 30-40                                               | 1.88   | (1.63-2.16)   | 1.59            | (1.23-2.04)      | 1.90    | (1.63-2.23)             | 1.19        | (0.90-1.57)         | 1.85       | (1.60-2.13)             |
| 40-50                                               | 2.19   | (1.87-2.55)   | 1.40            | (1.03-1.89)      | 2.15    | (1.81-2.57)             | 1.67        | (1.19-2.34)         | 2.15       | (1.84-2.51)             |
| 50-60                                               | 2.06   | (1.74-2.44)   | 1.46            | (1.07-2.01)      | 2.06    | (1.70-2.50)             | 2.04        | (1.51-2.75)         | 2.04       | (1.72-2.42)             |
| 60-70                                               | 2.90   | (2.24-3.77)   | 2.55            | (1.36-4.76)      | 2.99    | (2.19-4.09)             | 2.16        | (1.49-3.13)         | 2.83       | (2.18-3.67)             |
| 70+                                                 | 4.06   | (2.73-6.03)   | 5.47            | (2.30-13.05)     | 5.15    | (3.16-8.39)             | 3.44        | (2.09-5.68)         | 3.95       | (2.66-5.87)             |
| <b>Potential secondary case age</b>                 |        |               |                 |                  |         |                         |             |                     |            |                         |
| 0-10                                                | 0.72   | (0.61-0.84)   | 0.84            | (0.64-1.10)      | 0.71    | (0.60-0.85)             | 0.85        | (0.54-1.34)         | 0.77       | (0.65-0.90)             |
| 10-20                                               | 0.71   | (0.62-0.81)   | 0.82            | (0.64-1.04)      | 0.75    | (0.64-0.87)             | 0.56        | (0.38-0.82)         | 0.73       | (0.64-0.84)             |
| 20-30                                               | ref    | (.)           | ref             | (.)              | ref     | (.)                     | ref         | (.)                 | ref        | (.)                     |
| 30-40                                               | 1.28   | (1.11-1.48)   | 1.52            | (1.19-1.94)      | 1.32    | (1.12-1.55)             | 0.88        | (0.65-1.19)         | 1.33       | (1.15-1.55)             |
| 40-50                                               | 1.04   | (0.90-1.19)   | 1.19            | (0.93-1.51)      | 1.05    | (0.90-1.23)             | 0.83        | (0.61-1.15)         | 1.07       | (0.92-1.24)             |
| 50-60                                               | 0.80   | (0.69-0.92)   | 1.05            | (0.80-1.37)      | 0.81    | (0.69-0.96)             | 0.72        | (0.53-0.97)         | 0.83       | (0.72-0.97)             |
| 60-70                                               | 0.67   | (0.53-0.83)   | 0.75            | (0.49-1.15)      | 0.66    | (0.51-0.85)             | 0.69        | (0.48-0.99)         | 0.70       | (0.56-0.88)             |
| 70+                                                 | 0.46   | (0.33-0.65)   | 0.37            | (0.18-0.76)      | 0.53    | (0.35-0.78)             | 0.44        | (0.27-0.72)         | 0.48       | (0.34-0.68)             |
| <b>Household size</b>                               |        |               |                 |                  |         |                         |             |                     |            |                         |
| 2                                                   | 1.22   | (1.08-1.37)   | 1.13            | (0.92-1.40)      | 1.21    | (1.07-1.38)             | -           | -                   | 1.22       | (1.09-1.38)             |
| 3                                                   | 0.91   | (0.82-1.01)   | 0.94            | (0.78-1.13)      | 0.91    | (0.81-1.03)             | -           | -                   | 0.89       | (0.80-1.00)             |
| 4                                                   | ref    | (.)           | ref             | (.)              | ref     | (.)                     | -           | -                   | ref        | (.)                     |
| 5                                                   | 0.86   | (0.75-0.99)   | 0.95            | (0.76-1.19)      | 0.87    | (0.75-1.01)             | -           | -                   | 0.88       | (0.76-1.02)             |
| 6                                                   | 0.74   | (0.58-0.93)   | 0.65            | (0.43-0.98)      | 0.75    | (0.57-0.98)             | -           | -                   | 0.74       | (0.57-0.95)             |
| <b>Primary case sex</b>                             |        |               |                 |                  |         |                         |             |                     |            |                         |
| Male                                                | ref    | (.)           | ref             | (.)              | ref     | (.)                     | ref         | (.)                 | ref        | (.)                     |
| Female                                              | 1.15   | (1.08-1.22)   | 1.13            | (1.01-1.25)      | 1.16    | (1.08-1.24)             | 1.18        | (1.00-1.39)         | 1.15       | (1.08-1.23)             |
| <b>Potential secondary case sex</b>                 |        |               |                 |                  |         |                         |             |                     |            |                         |
| Male                                                | ref    | (.)           | ref             | (.)              | ref     | (.)                     | ref         | (.)                 | ref        | (.)                     |
| Female                                              | 1.07   | (0.98-1.16)   | 1.08            | (0.94-1.26)      | 1.07    | (0.98-1.18)             | 1.02        | (0.86-1.20)         | 1.07       | (0.98-1.16)             |
| <b>Primary case sample date</b>                     |        |               |                 |                  |         |                         |             |                     |            |                         |
| 20DEC2021                                           | 0.81   | (0.56-1.17)   | -               | -                | 0.89    | (0.57-1.38)             | 0.86        | (0.46-1.61)         | 0.79       | (0.54-1.16)             |
| 21DEC2021                                           | 0.95   | (0.65-1.41)   | -               | -                | 1.01    | (0.63-1.62)             | 1.05        | (0.54-2.04)         | 0.90       | (0.60-1.35)             |
| 22DEC2021                                           | 1.10   | (0.74-1.62)   | -               | -                | 1.21    | (0.72-2.06)             | 0.91        | (0.46-1.79)         | 1.09       | (0.73-1.63)             |
| 23DEC2021                                           | 1.02   | (0.68-1.54)   | -               | -                | 0.90    | (0.55-1.46)             | 0.50        | (0.25-1.01)         | 1.05       | (0.69-1.60)             |
| 24DEC2021                                           | 1.14   | (0.68-1.91)   | -               | -                | 0.98    | (0.51-1.89)             | 0.59        | (0.25-1.40)         | 0.97       | (0.57-1.64)             |
| 25DEC2021                                           | 1.49   | (0.93-2.39)   | -               | -                | 1.77    | (0.91-3.43)             | 0.73        | (0.31-1.73)         | 1.33       | (0.81-2.19)             |
| 26DEC2021                                           | 1.14   | (0.75-1.74)   | -               | -                | 0.87    | (0.53-1.43)             | 0.79        | (0.40-1.56)         | 1.10       | (0.71-1.70)             |
| 27DEC2021                                           | 1.00   | (0.70-1.43)   | -               | -                | 0.87    | (0.58-1.31)             | 0.68        | (0.38-1.23)         | 0.97       | (0.68-1.40)             |
| 28DEC2021                                           | 0.93   | (0.65-1.34)   | -               | -                | 0.86    | (0.57-1.30)             | 0.65        | (0.35-1.20)         | 0.91       | (0.62-1.33)             |
| 29DEC2021                                           | 1.08   | (0.69-1.67)   | -               | -                | 1.13    | (0.68-1.87)             | 0.76        | (0.36-1.59)         | 1.04       | (0.66-1.64)             |
| 30DEC2021                                           | 0.90   | (0.61-1.32)   | -               | -                | 0.77    | (0.49-1.19)             | 0.80        | (0.42-1.54)         | 0.86       | (0.58-1.29)             |
| 31DEC2021                                           | ref    | (.)           | ref             | (.)              | ref     | (.)                     | ref         | (.)                 | ref        | (.)                     |
| 01JAN2022                                           | 0.91   | (0.59-1.39)   | -               | -                | 0.80    | (0.48-1.33)             | 0.97        | (0.47-2.00)         | 0.84       | (0.54-1.31)             |
| 02JAN2022                                           | 0.89   | (0.64-1.24)   | -               | -                | 0.80    | (0.55-1.16)             | 0.61        | (0.35-1.07)         | 0.87       | (0.62-1.22)             |
| 03JAN2022                                           | 0.86   | (0.61-1.21)   | -               | -                | 0.76    | (0.52-1.13)             | 0.70        | (0.39-1.27)         | 0.84       | (0.59-1.20)             |
| 04JAN2022                                           | 0.80   | (0.51-1.25)   | -               | -                | 0.86    | (0.50-1.49)             | 0.41        | (0.18-0.94)         | 0.77       | (0.48-1.22)             |
| 05JAN2022                                           | 0.65   | (0.45-0.94)   | 0.68            | (0.48-0.96)      | 0.59    | (0.39-0.88)             | 0.40        | (0.22-0.76)         | 0.64       | (0.44-0.93)             |
| 06JAN2022                                           | 0.76   | (0.52-1.11)   | 0.80            | (0.56-1.15)      | 0.71    | (0.46-1.08)             | 0.47        | (0.24-0.90)         | 0.75       | (0.50-1.12)             |
| 07JAN2022                                           | 0.81   | (0.57-1.14)   | 0.85            | (0.62-1.17)      | 0.74    | (0.51-1.09)             | 0.63        | (0.35-1.14)         | 0.76       | (0.53-1.08)             |
| 08JAN2022                                           | 0.86   | (0.58-1.27)   | 0.93            | (0.64-1.34)      | 0.81    | (0.52-1.26)             | 0.34        | (0.16-0.73)         | 0.74       | (0.48-1.13)             |
| 09JAN2022                                           | 0.94   | (0.63-1.40)   | 0.99            | (0.68-1.44)      | 0.81    | (0.51-1.29)             | 0.86        | (0.42-1.76)         | 0.91       | (0.60-1.39)             |
| 10JAN2022                                           | 0.91   | (0.63-1.30)   | 0.93            | (0.66-1.30)      | 0.83    | (0.55-1.24)             | 0.58        | (0.30-1.11)         | 0.89       | (0.61-1.31)             |
| 11JAN2022                                           | 0.96   | (0.62-1.48)   | ref             | (.)              | 0.92    | (0.58-1.45)             | 0.48        | (0.21-1.11)         | 1.01       | (0.64-1.60)             |
| Number of observations                              | 17,945 |               | 6,275           |                  | 14,523  |                         | 3,367       |                     | 16,622     |                         |
| Number of households                                | 8,541  |               | 2,818           |                  | 6,860   |                         | 3,367       |                     | 8,059      |                         |

Notes: This table provides model estimates for the main specification (model I) as well as different robustness specifications. 95% confidence intervals are shown in parentheses. Standard errors are clustered on the household level.

Table 13: Robustness II

| Model                                               | I      |               | VI       |                           | VII              |             | VIII             |             | IX                |              |
|-----------------------------------------------------|--------|---------------|----------|---------------------------|------------------|-------------|------------------|-------------|-------------------|--------------|
|                                                     | OR     | Main (95%-CI) | Excl. OR | prev. HH infect. (95%-CI) | Cases day 2-7 OR | (95%-CI)    | Cases day 3-7 OR | (95%-CI)    | Control for Ct OR | (95%-CI)     |
| <b>Potential secondary case, vaccination status</b> |        |               |          |                           |                  |             |                  |             |                   |              |
| <i>Omicron BA.1 households</i>                      |        |               |          |                           |                  |             |                  |             |                   |              |
| Booster-vaccinated                                  | 0.65   | (0.58-0.73)   | 0.59     | (0.52-0.66)               | 0.67             | (0.60-0.76) | 0.72             | (0.62-0.82) | 0.57              | (0.47-0.68)  |
| Fully vaccinated                                    | ref    | (.)           | ref      | (.)                       | ref              | (.)         | ref              | (.)         | ref               | (.)          |
| Not-vaccinated                                      | 1.23   | (1.09-1.40)   | 1.07     | (0.92-1.24)               | 1.24             | (1.08-1.41) | 1.17             | (1.01-1.36) | 1.14              | (0.93-1.39)  |
| <i>Omicron BA.2 households</i>                      |        |               |          |                           |                  |             |                  |             |                   |              |
| Not-vaccinated                                      | 1.95   | (1.37-2.78)   | 1.83     | (1.24-2.71)               | 1.94             | (1.34-2.82) | 1.75             | (1.17-2.60) | 2.24              | (1.31-3.83)  |
| Fully vaccinated                                    | 2.45   | (1.77-3.40)   | 2.56     | (1.77-3.68)               | 2.30             | (1.63-3.25) | 2.02             | (1.40-2.90) | 2.29              | (1.40-3.76)  |
| Not-vaccinated                                      | 2.70   | (1.95-3.74)   | 2.36     | (1.65-3.36)               | 2.55             | (1.81-3.59) | 2.05             | (1.42-2.97) | 2.75              | (1.65-4.60)  |
| <b>Primary case, vaccination status</b>             |        |               |          |                           |                  |             |                  |             |                   |              |
| <i>Omicron BA.1 households</i>                      |        |               |          |                           |                  |             |                  |             |                   |              |
| Booster-vaccinated                                  | 0.77   | (0.67-0.88)   | 0.76     | (0.65-0.88)               | 0.74             | (0.64-0.85) | 0.75             | (0.64-0.88) | 0.71              | (0.56-0.89)  |
| Fully vaccinated                                    | ref    | (.)           | ref      | (.)                       | ref              | (.)         | ref              | (.)         | ref               | (.)          |
| Not-vaccinated                                      | 0.93   | (0.80-1.08)   | 0.95     | (0.80-1.12)               | 0.93             | (0.80-1.10) | 0.93             | (0.78-1.11) | 0.94              | (0.75-1.18)  |
| <i>Omicron BA.2 households</i>                      |        |               |          |                           |                  |             |                  |             |                   |              |
| Booster-vaccinated                                  | 0.47   | (0.32-0.71)   | 0.45     | (0.29-0.70)               | 0.52             | (0.34-0.79) | 0.63             | (0.40-0.98) | 0.33              | (0.18-0.61)  |
| Fully vaccinated                                    | 0.60   | (0.42-0.85)   | 0.60     | (0.41-0.88)               | 0.64             | (0.45-0.92) | 0.72             | (0.49-1.05) | 0.57              | (0.34-0.97)  |
| Not-vaccinated                                      | ref    | (.)           | ref      | (.)                       | ref              | (.)         | ref              | (.)         | ref               | (.)          |
| <b>Primary case age</b>                             |        |               |          |                           |                  |             |                  |             |                   |              |
| 0-10                                                | 2.69   | (2.18-3.33)   | 2.66     | (2.10-3.36)               | 2.74             | (2.19-3.42) | 2.96             | (2.33-3.76) | 2.23              | (1.60-3.10)  |
| 10-20                                               | 0.93   | (0.81-1.07)   | 0.87     | (0.74-1.02)               | 0.98             | (0.84-1.14) | 1.02             | (0.86-1.21) | 0.85              | (0.68-1.06)  |
| 20-30                                               | ref    | (.)           | ref      | (.)                       | ref              | (.)         | ref              | (.)         | ref               | (.)          |
| 30-40                                               | 1.88   | (1.63-2.16)   | 1.84     | (1.58-2.16)               | 1.88             | (1.62-2.18) | 1.94             | (1.65-2.28) | 1.66              | (1.32-2.07)  |
| 40-50                                               | 2.19   | (1.87-2.55)   | 2.15     | (1.81-2.56)               | 2.01             | (1.70-2.37) | 1.98             | (1.65-2.38) | 1.86              | (1.46-2.37)  |
| 50-60                                               | 2.06   | (1.74-2.44)   | 2.08     | (1.73-2.51)               | 1.98             | (1.65-2.37) | 2.02             | (1.66-2.46) | 1.80              | (1.39-2.34)  |
| 60-70                                               | 2.90   | (2.24-3.77)   | 2.86     | (2.17-3.77)               | 2.61             | (1.97-3.44) | 2.51             | (1.85-3.39) | 2.72              | (1.79-4.14)  |
| 70+                                                 | 4.06   | (2.73-6.03)   | 3.72     | (2.46-5.64)               | 4.21             | (2.78-6.38) | 4.03             | (2.62-6.21) | 6.18              | (2.87-13.32) |
| <b>Potential secondary case age</b>                 |        |               |          |                           |                  |             |                  |             |                   |              |
| 0-10                                                | 0.72   | (0.61-0.84)   | 0.69     | (0.58-0.83)               | 0.79             | (0.67-0.93) | 0.90             | (0.75-1.08) | 0.84              | (0.65-1.08)  |
| 10-20                                               | 0.71   | (0.62-0.81)   | 0.63     | (0.54-0.74)               | 0.77             | (0.67-0.89) | 0.79             | (0.67-0.93) | 0.89              | (0.72-1.10)  |
| 20-30                                               | ref    | (.)           | ref      | (.)                       | ref              | (.)         | ref              | (.)         | ref               | (.)          |
| 30-40                                               | 1.28   | (1.11-1.48)   | 1.20     | (1.03-1.40)               | 1.31             | (1.12-1.52) | 1.31             | (1.11-1.54) | 1.34              | (1.07-1.67)  |
| 40-50                                               | 1.04   | (0.90-1.19)   | 1.00     | (0.85-1.17)               | 1.07             | (0.92-1.25) | 1.11             | (0.94-1.31) | 1.13              | (0.90-1.40)  |
| 50-60                                               | 0.80   | (0.69-0.92)   | 0.74     | (0.63-0.87)               | 0.82             | (0.70-0.97) | 0.84             | (0.70-1.00) | 0.93              | (0.74-1.17)  |
| 60-70                                               | 0.67   | (0.53-0.83)   | 0.59     | (0.47-0.75)               | 0.67             | (0.53-0.85) | 0.73             | (0.56-0.94) | 0.71              | (0.49-1.02)  |
| 70+                                                 | 0.46   | (0.33-0.65)   | 0.44     | (0.30-0.63)               | 0.49             | (0.34-0.70) | 0.52             | (0.36-0.77) | 0.53              | (0.29-1.00)  |
| <b>Household size</b>                               |        |               |          |                           |                  |             |                  |             |                   |              |
| 2                                                   | 1.22   | (1.08-1.37)   | 1.15     | (1.02-1.31)               | 1.23             | (1.09-1.40) | 1.19             | (1.04-1.36) | 1.27              | (1.06-1.52)  |
| 3                                                   | 0.91   | (0.82-1.01)   | 0.90     | (0.80-1.01)               | 0.90             | (0.80-1.02) | 0.88             | (0.77-0.99) | 0.94              | (0.80-1.11)  |
| 4                                                   | ref    | (.)           | ref      | (.)                       | ref              | (.)         | ref              | (.)         | ref               | (.)          |
| 5                                                   | 0.86   | (0.75-0.99)   | 0.89     | (0.76-1.04)               | 0.88             | (0.76-1.01) | 0.90             | (0.77-1.04) | 0.83              | (0.67-1.02)  |
| 6                                                   | 0.74   | (0.58-0.93)   | 0.76     | (0.57-1.01)               | 0.75             | (0.59-0.97) | 0.79             | (0.61-1.03) | 0.80              | (0.56-1.15)  |
| <b>Primary case sex</b>                             |        |               |          |                           |                  |             |                  |             |                   |              |
| Male                                                | ref    | (.)           | ref      | (.)                       | ref              | (.)         | ref              | (.)         | ref               | (.)          |
| Female                                              | 1.15   | (1.08-1.22)   | 1.16     | (1.08-1.24)               | 1.14             | (1.06-1.22) | 1.12             | (1.03-1.20) | 1.14              | (1.03-1.26)  |
| <b>Potential secondary case sex</b>                 |        |               |          |                           |                  |             |                  |             |                   |              |
| Male                                                | ref    | (.)           | ref      | (.)                       | ref              | (.)         | ref              | (.)         | ref               | (.)          |
| Female                                              | 1.07   | (0.98-1.16)   | 1.09     | (0.99-1.19)               | 1.06             | (0.97-1.16) | 1.06             | (0.96-1.16) | 1.08              | (0.95-1.23)  |
| <b>Primary case sample date</b>                     |        |               |          |                           |                  |             |                  |             |                   |              |
| 20DEC2021                                           | 0.81   | (0.56-1.17)   | 0.80     | (0.54-1.18)               | 0.78             | (0.54-1.14) | 0.95             | (0.63-1.45) | 0.92              | (0.53-1.57)  |
| 21DEC2021                                           | 0.95   | (0.65-1.41)   | 0.95     | (0.63-1.42)               | 0.86             | (0.58-1.28) | 1.06             | (0.68-1.65) | 1.20              | (0.68-2.15)  |
| 22DEC2021                                           | 1.10   | (0.74-1.62)   | 0.97     | (0.64-1.47)               | 1.05             | (0.71-1.58) | 1.33             | (0.85-2.09) | 1.32              | (0.64-2.72)  |
| 23DEC2021                                           | 1.02   | (0.68-1.54)   | 1.02     | (0.66-1.57)               | 0.98             | (0.65-1.47) | 1.23             | (0.78-1.94) | 0.81              | (0.43-1.55)  |
| 24DEC2021                                           | 1.14   | (0.68-1.91)   | 1.21     | (0.70-2.09)               | 1.15             | (0.68-1.94) | 1.29             | (0.73-2.26) | 1.00              | (0.49-2.05)  |
| 25DEC2021                                           | 1.49   | (0.93-2.39)   | 1.53     | (0.91-2.57)               | 1.37             | (0.84-2.22) | 1.51             | (0.88-2.59) | 1.16              | (0.51-2.63)  |
| 26DEC2021                                           | 1.14   | (0.75-1.74)   | 1.17     | (0.75-1.84)               | 0.85             | (0.55-1.30) | 0.94             | (0.58-1.53) | 1.07              | (0.61-1.88)  |
| 27DEC2021                                           | 1.00   | (0.70-1.43)   | 1.00     | (0.69-1.46)               | 0.77             | (0.53-1.11) | 0.88             | (0.58-1.33) | 0.96              | (0.59-1.56)  |
| 28DEC2021                                           | 0.93   | (0.65-1.34)   | 0.93     | (0.63-1.37)               | 0.82             | (0.56-1.20) | 0.85             | (0.55-1.31) | 1.00              | (0.61-1.64)  |
| 29DEC2021                                           | 1.08   | (0.69-1.67)   | 1.05     | (0.66-1.68)               | 0.79             | (0.49-1.26) | 0.98             | (0.58-1.66) | 1.34              | (0.74-2.40)  |
| 30DEC2021                                           | 0.90   | (0.61-1.32)   | 0.82     | (0.54-1.23)               | 0.85             | (0.57-1.27) | 1.08             | (0.69-1.69) | 0.97              | (0.56-1.69)  |
| 31DEC2021                                           | ref    | (.)           | ref      | (.)                       | ref              | (.)         | ref              | (.)         | ref               | (.)          |
| 01JAN2022                                           | 0.91   | (0.59-1.39)   | 1.03     | (0.65-1.61)               | 0.75             | (0.48-1.16) | 0.83             | (0.51-1.36) | 0.94              | (0.50-1.76)  |
| 02JAN2022                                           | 0.89   | (0.64-1.24)   | 0.86     | (0.61-1.22)               | 0.72             | (0.52-1.01) | 0.80             | (0.55-1.17) | 0.89              | (0.57-1.39)  |
| 03JAN2022                                           | 0.86   | (0.61-1.21)   | 0.86     | (0.60-1.24)               | 0.68             | (0.48-0.97) | 0.85             | (0.57-1.27) | 0.79              | (0.51-1.21)  |
| 04JAN2022                                           | 0.80   | (0.51-1.25)   | 0.85     | (0.53-1.36)               | 0.73             | (0.45-1.18) | 0.78             | (0.45-1.36) | 0.77              | (0.40-1.46)  |
| 05JAN2022                                           | 0.65   | (0.45-0.94)   | 0.66     | (0.45-0.96)               | 0.62             | (0.43-0.90) | 0.74             | (0.49-1.13) | 0.70              | (0.42-1.16)  |
| 06JAN2022                                           | 0.76   | (0.52-1.11)   | 0.77     | (0.51-1.17)               | 0.68             | (0.45-1.00) | 0.81             | (0.52-1.26) | 0.80              | (0.49-1.32)  |
| 07JAN2022                                           | 0.81   | (0.57-1.14)   | 0.80     | (0.56-1.15)               | 0.81             | (0.57-1.14) | 0.96             | (0.65-1.41) | 0.87              | (0.56-1.36)  |
| 08JAN2022                                           | 0.86   | (0.58-1.27)   | 0.88     | (0.58-1.33)               | 0.84             | (0.56-1.24) | 1.00             | (0.64-1.55) | 0.86              | (0.53-1.40)  |
| 09JAN2022                                           | 0.94   | (0.63-1.40)   | 0.96     | (0.63-1.45)               | 0.84             | (0.56-1.27) | 0.95             | (0.60-1.49) | 1.00              | (0.55-1.84)  |
| 10JAN2022                                           | 0.91   | (0.63-1.30)   | 0.87     | (0.59-1.27)               | 0.78             | (0.54-1.13) | 0.88             | (0.58-1.34) | 0.79              | (0.47-1.30)  |
| 11JAN2022                                           | 0.96   | (0.62-1.48)   | 1.01     | (0.64-1.61)               | 0.81             | (0.52-1.27) | 0.95             | (0.58-1.57) | 1.04              | (0.63-1.73)  |
| <b>Ct value</b>                                     |        |               |          |                           |                  |             |                  |             |                   |              |
| 16-18                                               | -      | -             | -        | -                         | -                | -           | -                | -           | 1.76              | (0.73-4.23)  |
| 18-20                                               | -      | -             | -        | -                         | -                | -           | -                | -           | 1.57              | (0.97-2.53)  |
| 20-22                                               | -      | -             | -        | -                         | -                | -           | -                | -           | 1.31              | (1.00-1.71)  |
| 22-24                                               | -      | -             | -        | -                         | -                | -           | -                | -           | 1.51              | (1.20-1.90)  |
| 24-26                                               | -      | -             | -        | -                         | -                | -           | -                | -           | 1.15              | (0.92-1.42)  |
| 26-28                                               | -      | -             | -        | -                         | -                | -           | -                | -           | 1.04              | (0.83-1.30)  |
| 28-30                                               | -      | -             | -        | -                         | -                | -           | -                | -           | ref               | (.)          |
| 30-32                                               | -      | -             | -        | -                         | -                | -           | -                | -           | 0.90              | (0.70-1.15)  |
| 32-34                                               | -      | -             | -        | -                         | -                | -           | -                | -           | 0.74              | (0.57-0.98)  |
| 34-36                                               | -      | -             | -        | -                         | -                | -           | -                | -           | 1.05              | (0.60-1.81)  |
| Number of observations                              | 17,945 |               | 14,497   |                           | 16,765           |             | 15,678           |             | 7,349             |              |
| Number of households                                | 8,541  |               | 7,119    |                           | 8,206            |             | 7,861            |             | 3,505             |              |

Notes: This table provides model estimates for the main specification (model I) as well as different robustness specifications. 95% confidence intervals are shown in parentheses. Standard errors are clustered on the household level.

Table 14: Relative effect of Omicron BA.2 vs. BA.1, by stratification

|                         | Susceptibility      |                     |                     | Transmissibility    |                     |                     |
|-------------------------|---------------------|---------------------|---------------------|---------------------|---------------------|---------------------|
|                         | Unvaccinated        | Fully vaccinated    | Booster vaccinated  | Unvaccinated        | Fully vaccinated    | Booster vaccinated  |
| Omicron BA.2 households | 2.74<br>(1.76-4.27) | 1.99<br>(1.26-3.16) | 3.54<br>(1.86-6.76) | 3.92<br>(2.49-6.16) | 1.59<br>(1.10-2.29) | 1.11<br>(0.58-2.14) |
| Omicron BA.1 households | ref<br>(.)          | ref<br>(.)          | ref<br>(.)          | ref<br>(.)          | ref<br>(.)          | ref<br>(.)          |
| Number of observations  | 4,631               | 7,838               | 5,476               | 3,500               | 10,659              | 3,786               |
| Number of households    | 3,030               | 5,391               | 4,084               | 1,465               | 4,895               | 2,181               |

Notes: This table provides model estimates similar to Table 3, but with stratification of the sample. For the susceptibility estimates, we stratify by the vaccination status of the potential secondary case. For the transmissibility estimates, we stratify by the vaccination status of the primary case. 95% confidence intervals are shown in parentheses. Standard errors are clustered on the household level.
